1 **Title: E6AP is important for HPV E6's role in regulating epithelial homeostasis and its loss impairs**  
2 **keratinocyte commitment to differentiation**

3

4

5 Wen Yin<sup>1</sup>, Nagayasu Egawa<sup>1</sup>, Ke Zheng<sup>1</sup>, Heather Griffin<sup>1</sup>, Ademola Aiyenuro<sup>1</sup>, Jacob Bornstein<sup>2</sup>, John  
6 Doorbar<sup>1\*</sup>

7

8 <sup>1</sup>Department of Pathology, Tennis court road, University of Cambridge, Cambridge, UK

9

10 <sup>2</sup>Gynecologist & Obstetrician, Colposcopy, Azrieli Faculty of Medicine of Bar-Ilan University,  
11 and Galilee Medical Center - Nahariya

12

13

14 \*Correspondence: John Doorbar, [jd121@cam.ac.uk](mailto:jd121@cam.ac.uk)

15

16

17

18

19

20

21

22

23

24

25

26

27 **Abstract**

28 Human papillomaviruses (HPV) typically cause chronic infections by modulating homeostasis of  
29 infected basal cell to ensure persistence. Using FUCCI and cell-cell competition assays, we established  
30 the role of two common viral targets of low-risk and high-risk E6 proteins, E6AP and NHERF1, on four  
31 key components of epithelial homeostasis. These includes cell density, proliferation, commitment to  
32 differentiation and basal layer delamination. Our RNA sequencing results validated E6's effects on  
33 homeostasis and revealed similar transcriptional gene regulation of E6-expressing cells and E6AP<sup>-/-</sup>  
34 cells. For example, yes-associated protein (YAP) target genes were up-regulated by either E6  
35 expression or E6AP depletion. This is also supported by YAP expression pattern in both monolayer cell  
36 culture and HPV-infected clinical tissues. As the conserved binding partner of Alpha group HPV E6  
37 proteins, the precise role of E6AP in modulating keratinocyte phenotype and associated signalling  
38 pathways have not been defined. We demonstrate that deletion of E6AP in keratinocytes delayed the  
39 onset of differentiation and the abundance of E6AP is reduced in HPV-infected tissue. This suggests  
40 that Alpha E6 regulates epithelium homeostasis by inhibiting E6AP's activity, leading to alteration of  
41 multiple downstream pathways including YAP activation. Potential treatments can thus be developed  
42 to resolve the reservoir of HPV infection.

43

44

45

46

47

48

49

50

51

52

## 53 **Introduction**

54 Human papillomaviruses (HPV) are non-enveloped double-stranded DNA viruses that infect multiple  
55 epithelial sites (McBride, 2017; John Doorbar, 2015). So far, more than 200 HPV types based on L1  
56 viral gene sequence identity have been discovered, which are classified into five genera: Alpha-, Beta-,  
57 Gamma, Mu and Nu-papillomaviruses (Bernard et al., 2010). The Alpha genus comprised of viruses  
58 that can either infect cutaneous or mucosal epithelial sites, those mucosal HPVs can be further  
59 classified into high-risk and low-risk HPVs based on the cancer risk associated with their infections  
60 (Doorbar et al., 2012; John Doorbar, 2015). HPV16 and HPV11 are representatives for the Alpha high-  
61 risk group and the low-risk group. HPVs generally cause self-limiting epithelial lesions that are usually  
62 resolved by the host immune system over time. However, the high-risk mucosal HPV infections can  
63 sometimes persist and lead to carcinomas (McBride, 2022). Although low-risk HPVs rarely cause  
64 malignancies, the size and location of the benign papillomas can render these lesions medically serious  
65 (Egawa & Doorbar, 2017). For example, recurrent respiratory papillomatosis (RRP) caused by HPV11  
66 in children has no effective treatment and can only be controlled by repeat surgery. Condyloma  
67 acuminatum caused by HPV6 and HPV11 is one of the most widespread sexually transmitted disease  
68 (Goon et al., 2008; Ryan Ivancic et al., 2018).

69

70 The epidermis is a stratified epithelium composed of morphologically distinct cellular layers that  
71 reflect the terminal differentiation process of keratinocytes (Watt, 1989). Basal keratinocytes  
72 proliferate and expand to reach a specific density which triggers contact inhibition signals. This causes  
73 the cells to exit the cell cycle and commit to differentiation. Subsequently, keratinocytes leave the  
74 basal layer (delamination) and undergo an upward-directed transit into the more superficial spinous,  
75 granular, and cornified layers (Rice & Rompolas, 2020). Thus, epithelial homeostasis is maintained by  
76 the careful regulation of proliferation, basal cell density, delamination and differentiation. HPV viral  
77 proteins impart advantages to infected basal cells through modulating these key procedures, leading  
78 to lesion expansion and maintenance (Doorbar et al., 2021). Previous literature has indicated that E6

79 protein as a homeostasis regulator during productive infection, and in both the high and low-risk Alpha  
80 types, can regulate p53 and thus indirectly Notch-mediated epithelial differentiation (Khelil et al.,  
81 2021; Kranjec et al., 2017; Murakami et al., 2019; Yugawa et al., 2007). Moreover, accumulating  
82 evidence suggests that E6 modulates epithelial homeostasis through interacting with key molecules  
83 involved in WNT, NOTCH and HIPPO signalling (Gupta et al., 2018; Lichtig et al., 2010; Olmedo-Nieva  
84 et al., 2020; Sominsky et al., 2014). There is increasing evidence that the HIPPO pathway effector yes-  
85 associated protein (YAP) plays pivotal role in controlling epidermal homeostasis and high-risk E6 has  
86 been shown to control YAP nucleus-cytoplasm shift to activate YAP transcriptional activity (He et al.,  
87 2015; Webb Strickland et al., 2018). The HIPPO pathway senses mechanical cues such as cell density  
88 and contact signals from the basement membrane. Once activated, YAP is phosphorylated by LATS1/2  
89 kinases and sequestered in the cytoplasm. When the hippo kinases are inactive, YAP is translocated  
90 into the nucleus and activate the downstream genes to drive keratinocyte proliferation (Corley et al.,  
91 2018; Webb Strickland et al., 2018). It was also shown that the inhibition of YAP activity triggers  
92 keratinocyte differentiation (Totaro et al., 2017; Totaro et al., 2018).

93

94 It has been reported previously that the Alpha genus E6 proteins are the only group that preferentially  
95 interacts with E6AP rather than MAML1, amongst which some E6 proteins further acquired the ability  
96 to induce E6AP degradation (Brimer et al., 2017). E6 typically associates with E6AP to form a complex  
97 that recruits secondary substrates such as p53 or NHERF1 for proteasomal degradation (Brimer et al.,  
98 2017; Drews et al., 2019; Zimmermann et al., 1999). Indeed, we believe that these cellular targets of  
99 E6 are important regulatory factors involved in epithelial homeostasis control. As the conserved  
100 binding partner of Alpha group E6, E6AP is likely to play a central role and the consequences of E6AP  
101 association vary among E6 proteins. For instance, E6AP binding does not necessarily trigger its  
102 ubiquitination activity (Brimer et al., 2017). Although the downstream consequences of E6AP  
103 degradation by E6 are poorly understood, it was reported that E6AP regulates WNT signalling, which  
104 is intensified by E6 in primary keratinocytes (Sominsky et al., 2014). Also, E6AP was found to promote

105 cell growth in multiple cell types (Amit Mishra et al., 2009; Ramamoorthy et al., 2012; Srinivasan &  
106 Nawaz, 2011), indicating a potential role for E6AP to regulate skin homeostasis. NHERF1 is one of the  
107 first cellular targets discovered to be degraded by both high- and low-risk E6-E6AP complex, which has  
108 been shown to interact with beta-catenin and YAP directly (Accardi et al., 2011; Georgescu et al., 2016).  
109 Also, it was demonstrated that NHERF1 degradation by 16E6 led to activation of the WNT pathway  
110 (Drews et al., 2019). Thus, E6-directed NHERF1 degradation may also contribute to homeostasis  
111 regulation in epithelium.

112

113 Low-risk HPVs successfully survive and cause chronic lesions in the epithelium (Del Pino et al., 2012).  
114 Thus, low-risk HPVs must clearly possess the basic set of homeostatic functions to support their  
115 persistence in the basal epithelium (Doorbar et al., 2021). It is anticipated that these functions are  
116 conserved across the Alpha papillomavirus genus and important for maintaining virus lifecycle. In this  
117 study, we have dissected E6 functions in regulating homeostasis in normal spontaneously  
118 immortalised keratinocytes (NIKS) (Allen-Hoffmann et al., 2000) and found that E6AP and NHERF1 play  
119 important roles in these processes. Moreover, Clinical observations support the idea that key cellular  
120 targets of E6, including E6AP, NHERF1 and YAP, are regulated by the virus in the basal layer during  
121 HPV lifecycle. Intriguingly, we discovered, to our surprise, that E6AP has novel functions as a  
122 homeostasis modulator by using E6AP<sup>-/-</sup> NIKS keratinocyte cell lines. RNA sequencing results revealed  
123 that the absence of E6AP suppressed the normal differentiation-related gene expression pattern in  
124 keratinocytes. Additionally, E6 expression or E6AP depletion activated a similar subset of YAP target  
125 genes. Therefore, our results suggest that E6 regulates key homeostatic processes in epithelium basal  
126 layer through inhibiting E6AP function. Disruption of the homeostatic pathway may have detrimental  
127 effects on viral persistence and offers attractive target for therapeutic approaches.

128

129

130

## 131 Results

### 132 11E6 and 16E6 proteins modulate the balance between cell proliferation and differentiation

133 Recent work has demonstrated the role of E6 proteins in regulating multiple aspects of homeostasis  
134 and signaling pathways in keratinocytes. This includes E6-enhanced keratinocyte proliferation, E6-  
135 mediated inhibition in keratinocyte differentiation as well as effect on cell-cell contact (Herfs et al.,  
136 2017; Kranjec et al., 2017; Murakami et al., 2019; L Sherman & Schlegel, 1996; Levana Sherman et al.,  
137 2002). To maintain basal layer homeostasis, four processes need to be precisely controlled: cell cycle  
138 entry that suggests proliferative potential, cell density, timing of delamination and differentiation  
139 (Saunders-Wood et al., 2022). Firstly, to monitor the impact of E6 proteins upon cell cycle status, the  
140 fluorescent ubiquitination-based cell cycle indicator (FUCCI) system was used (Koh et al., 2017; Saitou  
141 & Imamura, 2016). FUCCI relies on the phase-dependent proteolysis of the oscillators Cdt1 and  
142 Geminin, and it is a powerful tool in visualizing cell cycle progression (figure 1A). By combining the  
143 FUCCI system with differentiation marker K10 and DAPI staining, this system allows the examination  
144 of three of the four components: cell cycle, differentiation and saturation density. Preliminary results  
145 using this system indicated that when FUCCI-expressing NIKS cells transduced with empty vector (EV)  
146 reached post-confluence, there were more Cdt1-mKO2 positive cells (red) and less Gemini-mAG  
147 positive cells (green) compared to E6-expressing NIKS cells at similar density (figure 1B). This is  
148 compatible with our understanding of E6-mediated cell proliferation upon contact inhibition. Also,  
149 NIKS-EV displayed higher K10 expression than NIKS-E6 cells, suggesting more cells committed to  
150 terminal differentiation in the absence of E6 expression. NIKS-E6 cells grow at different rates  
151 compared with NIKS-EV (Kranjec et al., 2017; Murakami et al., 2019), thus we decided to plate NIKS  
152 cells at pre- to post-confluence to assess the impact of E6 expression on cell phenotypes at different  
153 densities. Cells were left to adhere and form contacts for 72 hours after plating, then fixed and  
154 scanned by Confocal microscopy. High content imaging allows quantifications of the number of cells,  
155 K10-positive cells and Geminin-mAG positive cells for each field (figure 1C-D). In normal keratinocytes,

156 as the cell density increases, contact inhibition is triggered and most cells enter G1 or G0 phase and  
157 begin to differentiate (Rice & Rompolas, 2020; Watt et al., 1988). Thus, the number of geminin-  
158 positive cells per field decreased as the number of cells increased. As shown in figure C, geminin-  
159 positive NIKS-EV cells declined from 32.6% to 7% and reached the steady state level. Cells started to  
160 express K10 after saturation density has reached approximately 10,000 cells per field (figure D). In  
161 comparison to NIKS-EV cells, the number of geminin-positive cells for 11E6-expressing NIKS was 37.7%  
162 at pre-confluence and dropped to 12% at post-confluence. For 16E6-expressing NIKS, geminin positive  
163 cells decreased from 46.4% to 14%. Thus, an increase of cycling cells was observed at both pre- and  
164 post-confluence for NIKS expressing either 11E6 or 16E6. Additionally, the expression of 11E6 or 16E6  
165 increased the cell saturation density to approximately 14,000 cells or 17,000 cells/field respectively  
166 and delayed the threshold in which keratinocyte differentiation is triggered. Overall, our results  
167 suggest the roles of E6 in adjusting homeostasis steady state which alters the timing of cells transition  
168 from proliferation to differentiation.

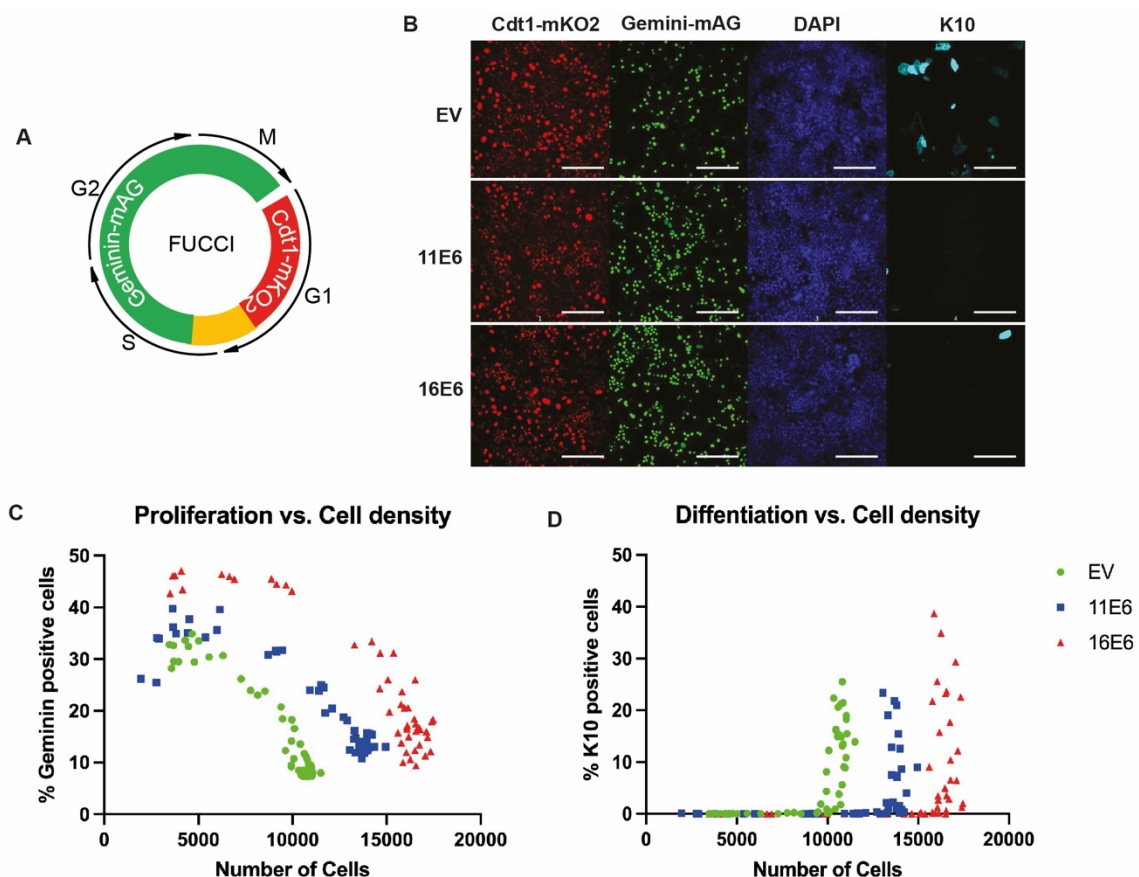

170 **Figure 1. 11E6 and 16E6 proteins regulate cell cycle progression, saturation density and**  
171 **differentiation of human keratinocytes.** (A) A schematic diagram of FUCCI system is shown. (B) FUCCI-  
172 expressing NIKS cells were stably transduced with retroviral vectors harbouring empty vector (EV),  
173 11E6 and 16E6 and cultured for 72 hours to reach post-confluence (10,000 cells/field). NIKS cells were  
174 fixed with 4% PFA and stained with anti-K10 antibodies (Abcam, ab9026). Nuclei were stained with  
175 DAPI. Red: Cdt1-mKO2 (G1 phase); Green: Geminin-mAG (S/G2/M phase); Blue: DAPI; Cyan: K10.  
176 (Original magnification, x20. Scale bar=200µm) (C-D) FUCCI NIKS cells transduced with retroviral vector  
177 harbouring EV, 11E6 or 16E6 were plated at 12 different densities in 96 well plates. After 72 hours,  
178 NIKS cells were fixed and stained with anti-K10 antibodies. Nuclei were stained with DAPI. Images for  
179 9 fields in each well were captured by High content confocal imaging. The number of cells, % Geminin  
180 positive cells and % K10 positive cells in each field were quantified with Harmony image analysis  
181 software (Perkinelmer). The area of each field is 0.42mm<sup>2</sup>.

182

### 183 **E6AP and NHERF1 are crucial for E6 functions in cell proliferation and differentiation**

184 After demonstrating that the E6 modifies the proliferation-differentiation trigger point, we then  
185 explored the underlying mechanism by focusing on existing E6 target proteins. E6AP is a conserved  
186 binding partner for Alpha group E6 proteins, we hypothesised that E6AP has a role in E6-regulated  
187 phenotypes as described above. In addition, NHERF1 was one of the first cellular proteins discovered  
188 that can be degraded by both high and low-risk E6 proteins (Accardi et al., 2011; Id et al., 2019). It  
189 interacts with a range of signalling proteins including YAP, PTEN and frizzled receptors (Georgescu et  
190 al., 2016; Wheeler et al., 2011). Several previously described E6AP-binding deficient mutants (Nicole  
191 Brimer, Charles Lyons, 2007; Oh et al., 2004; Zimmermann et al., 1999), 11E6<sup>W133R</sup>, 11E6<sup>L111Q</sup> and  
192 16E6<sup>L50G</sup>, were constructed (table 1). NHERF1-binding deficient 16E6<sup>F69A</sup> mutant was established  
193 based on the work of Drews *et al.*, 2019 and a corresponding point mutation in 11E6 was also  
194 generated (11E6<sup>L70A</sup>). Both mutants were validated for NHERF1 degradation (figure 2-supplementary  
195 1) and included in the same experiment with FUCCI-expressing NIKS cells. Intriguingly, the ability of E6



196 to modulate proliferation, differentiation and saturation density was compromised by losing E6AP  
197 binding. As shown in figure 2B, cells expressing 11E6<sup>W133R</sup> and 11E6<sup>L111Q</sup> did not reach the same  
198 saturation density as the cells expressing 11E6<sup>WT</sup>. The percentage of geminin-positive cells was also  
199 decreased at post-confluence and cells started to differentiate at a lower density compared to NIKS  
200 expressing 11E6<sup>WT</sup>. Similarly, L70A mutation also abolished 11E6's ability in regulating cell cycle,  
201 density and differentiation as well, suggesting an important role for NHERF1 degradation in 11E6  
202 functions. For 16E6 group shown in figure 2C, all three mentioned phenotypes for NIKS cells expressing  
203 16E6<sup>L50G</sup> were lost, whereas 16E6<sup>F69A</sup>-expressing NIKS cells resembled the behaviour of 16E6<sup>WT</sup> NIKS.  
204 This indicates E6AP is a significant contributor of 16E6 functions in the regulation of proliferation-  
205 differentiation switch. Furthermore, it appears that NHERF1 degradation plays a more critical role in  
206 this process for 11E6. While E6AP is a direct target of Alpha group E6, NHERF1 is one of the several  
207 secondary targets of the 16E6-E6AP complex. It is possible that other identified targets of 16E6 such  
208 as the DLG, scribble and other PDZ proteins are involved in this process (Vats et al., 2019).

209 **Table 1: summary of E6 mutants used in this study.** E6 mutants utilised in this work and associated  
210 functional defects.

| E6 mutant             | Functional consequence             | Reference                             |
|-----------------------|------------------------------------|---------------------------------------|
| 11E6 <sup>L70A</sup>  | Loss of NHERF1 degradation         | Validated in figure 2 supplementary 1 |
| 11E6 <sup>L111Q</sup> | Loss of E6AP binding               | Oh et al., 2004; Brimer et al., 2007  |
| 11E6 <sup>W133R</sup> | Loss of E6AP binding               | Oh et al., 2004; Brimer et al., 2007  |
| 16E6 <sup>L50G</sup>  | Loss of E6AP binding               | Zimmermann, Holger, et al., 1999      |
| 16E6 <sup>F69A</sup>  | Loss of NHERF1 binding/degradation | Drews et al., 2019                    |

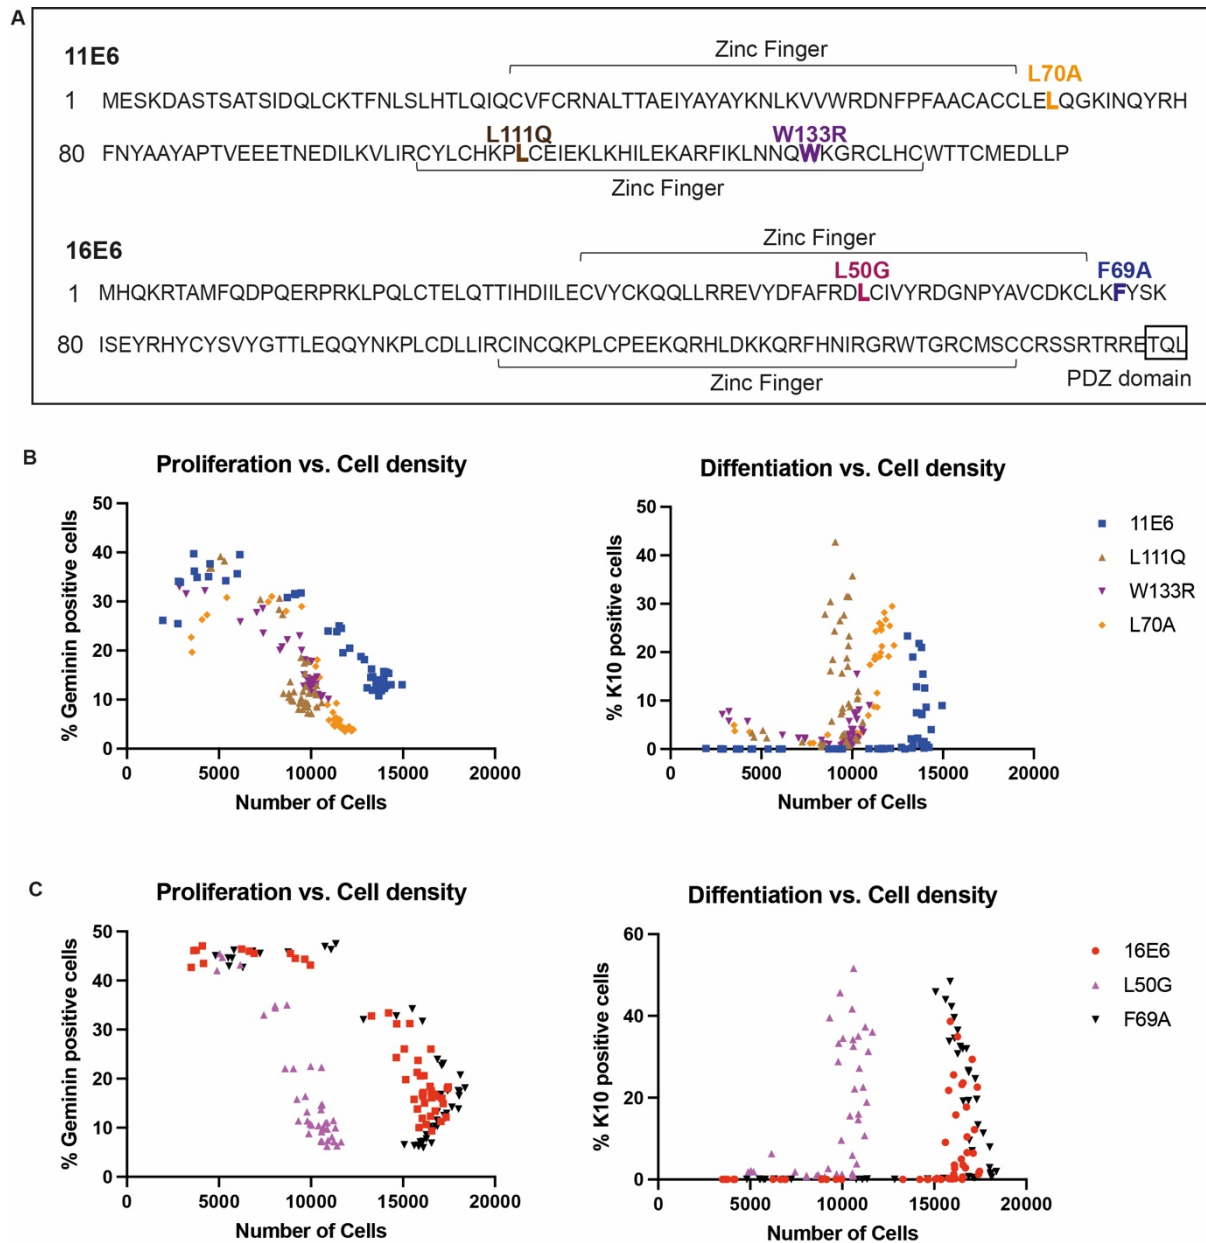

211

212 **Figure 2. Role of E6AP and NHERF1 in E6-regulated keratinocyte phenotypes.** (A) Amino acid

213 sequences of 11E6 and 16E6. Point mutations are indicated by coloured text. (B) 11E6 requires E6AP

214 binding or NHERF1 binding to modulate proliferation, differentiation and saturation density of NIKS

215 cells. FUCCI NIKS transduced with retroviral vectors harbouring 11E6 or 11E6 mutants were cultured

216 to grow at 12 different cell densities. Cells were fixed with 4% PFA and stained with anti-K10 antibodies.

217 Nuclei were stained with DAPI. % Geminin positive cells, % K10-positive cells and the number of cells

218 were quantified in each field. The area of one field is 0.42mm<sup>2</sup>. (C) 16E6 requires E6AP but not NHERF1

219 binding to modulate proliferation, differentiation and saturation density of NIKS cells.

220 **E6AP but not NHERF1 contributes to E6's competitive advantage in the lower layer of keratinocytes**

221 Given E6's functions identified above, we then sought to explore the consequences at the cell  
222 population level. Cell-cell competition assays enable us to study not only the 'enhanced fitness' that  
223 E6 confers on keratinocytes in the lower layer, but also allow us to assess keratinocyte delamination.  
224 Competition assays described in Saunders-Wood *et al.*, 2022 was used as a model to mimic aspects of  
225 epithelium basal layer. NIKS<sup>mCherry</sup> cells transduced with either E6<sup>WT</sup> or E6 mutants and NIKS<sup>eGFP</sup>-EV cells  
226 were seeded at the same ratio to form a confluent monolayer on day one. Over a course of nine days,  
227 the cell populations were grown to form at least two layers and fixed at each time point. Images of  
228 the lower layer and upper layer of cells were captured by Z-stack confocal microscopy (figure 3A). Day  
229 nine images are presented to show the most obvious effect. On day one, all experimental groups  
230 started at 50:50 ratio for mCherry and eGFP NIKS cells. However, inhibitory effect on cell growth was  
231 observed for mCherry cells in comparison to eGFP cells, thus the proportion of NIKS<sup>mCherry</sup>-EV cells  
232 against NIKS<sup>eGFP</sup>-EV cells dropped below 50% at day 7 and day 9 (figure 3B). Despite this, the 11E6- and  
233 16E6-expressing NIKS<sup>mCherry</sup> cells gradually increased in proportion and outcompeted NIKS<sup>eGFP</sup>-EV cells,  
234 reaching 71.6% and 83.3% coverage respectively in the lower layer on day nine. This suggests that the  
235 NIKS<sup>eGFP</sup>-EV cells were 'less-fit' as they were displaced by NIKS<sup>mCherry</sup>-E6 cells from the lower layer and  
236 moved to the upper layer (figure 3A). Furthermore, E6AP-binding mutant and NHERF1-binding mutant  
237 cell lines enabled us to investigate the contribution of E6AP and NHERF1 in E6 functions during cell-  
238 cell competition (Figure 3C-D). We found that the ability of both cell populations expressing 11E6  
239 E6AP-binding mutants to persist in the lower layer was significantly compromised in comparison to  
240 11E6<sup>WT</sup>. On day nine, both NIKS<sup>mCherry</sup>-11E6<sup>W133R</sup> and NIKS<sup>mCherry</sup>-11E6<sup>L111Q</sup> cells reached about 60% in  
241 the lower layer, retaining a slight growth advantage against NIKS<sup>eGFP</sup> cells. They also lost the ability to  
242 displace NIKS<sup>eGFP</sup> cells into the upper layer (figure A). However, NHERF1-binding mutant 11E6<sup>L70A</sup>-  
243 expressing NIKS<sup>mCherry</sup> cells behaved in a similar manner as NIKS<sup>mCherry</sup>-11E6<sup>WT</sup>, suggesting NHERF1 may  
244 not be involved in E6 function during competition assay. In parallel, we noticed that the competitive  
245 advantage of 16E6<sup>L50G</sup> mutant-expressing NIKS<sup>mCherry</sup> cells was also significantly compromised in

246 comparison to NIKS<sup>mCherry</sup>-16E6<sup>WT</sup> and occupied approximately 67.9% in the lower layer. 16E6<sup>F69A</sup>  
 247 mutant-expressing NIKS<sup>mCherry</sup> cells resembled the trend of NIKS<sup>mCherry</sup>-16E6<sup>WT</sup> cells at all time points,  
 248 reaching about 79% at day 9. This further indicates that NHERF1 may not play an important role in E6  
 249 regulation of cell delamination. This is also consistent with recently published results (Brimer & Vande  
 250 Pol, 2022).

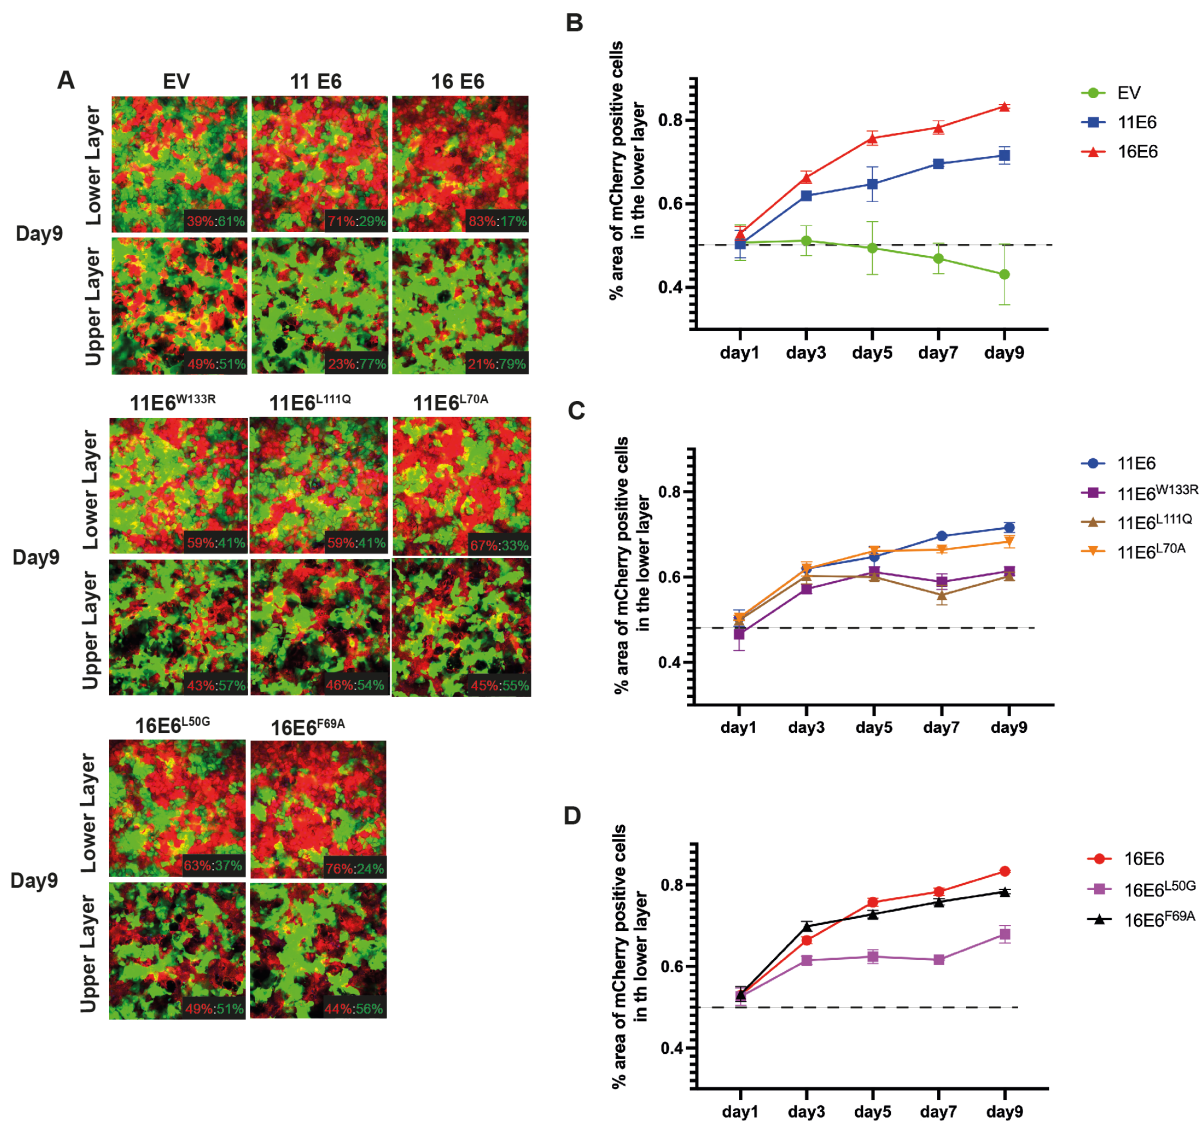

251

252 **Figure 3. NIKS cells expressing E6 preferentially persist in the lower layer of cells in a high-density**  
 253 **competition assay.** (A) Representative images of the lower and upper layers of each group on day nine

254 are shown: NIKS-eGFP-EV cells were seeded together with NIKS-mCherry-EV or NIKS-mCherry cells  
255 expressing 11E6/11E6<sup>W133R</sup>/11E6<sup>L111Q</sup>/11E6<sup>L70A</sup>/16E6/16E6<sup>L50G</sup>/16E6<sup>F69A</sup>. Ratio of area occupied by  
256 mCherry cells to eGFP cells is presented at the lower right corner of each image. Images were captured  
257 and quantified by Harmony high content imaging and analysis software (Perkinelmer). Original  
258 magnification: x20. (B-D) Graphs showing the % area of NIKS mCherry cells in the lower layer over the  
259 course of competition assay. NIKS mCherry for each cell line against NIKS eGFP was seeded at ratio  
260 50% : 50% and were cultured for nine days. The plates were then fixed by 4% PFA at day 1, 3, 5, 7 and  
261 9, followed by staining with DAPI. The lower layer of cells was scanned by Confocal microscopy. The  
262 area of mCherry cells was quantified for each group of cell lines and data are means  $\pm$  standard errors  
263 of three random fields. The area of one field is 0.42mm<sup>2</sup>.

#### 264 **Condyloma staining revealed several cellular targets regulated during low-risk HPV productive** 265 **lifecycle**

266 Condyloma acuminatum is HPV-induced squamous epithelial proliferation in the anogenital region,  
267 caused by low-risk HPV types 6 and 11 (Gupta et al., 2018). Figure 4A shows a condyloma biopsy  
268 collected from patients infected with HPV11 and stained with haemotoxylin & eosin (H&E). It  
269 comprises of both lesion and uninfected area, allowing us to make direct comparisons with the  
270 following biomarker analysis. To confirm the expression of HPV viral genes in epithelium basal layer,  
271 RNAscope was performed on condyloma biopsies to indicate the expression pattern of HPV11E6E7  
272 mRNA (figure 4B). 11E6E7 mRNA expression was restrained in the basal layer and the lower layers of  
273 the lesion. The mRNA abundance was increased significantly in the middle and upper layers. This is  
274 typical during low-risk HPV productive infection. In the same region, biomarkers such as MCM7 and  
275 K10 were applied to provide indications for cell proliferation and differentiation status (figure 4C-D).  
276 Quantification of nucleus per  $\mu$ m shows an elevated cell density in the lesion than uninfected  
277 epithelium (figure 4E). Additionally, percentage of MCM7 positive cells was significantly increased in  
278 the lesion, suggesting enhanced cell proliferation (figure 4F). The increased distance from basal lamina

279 to the cells starting to express K10 indicated a delay in the commitment to differentiation (figure 4G).  
280 This suggests that the timing of differentiation marker expression was delayed in infected cells. Overall,  
281 these results are in correlation with our findings in phenotypic assays (figures 1 and 2).

282

283 To assess the clinical relevance of our observations on cell culture, E6AP and NHERF1 staining were  
284 applied on adjacent sections of the several condyloma biopsies. The localisation and expression  
285 pattern of these proteins were examined in both infected and non-infected tissue areas. Few previous  
286 studies reported the expression pattern of E6AP in human stratified epithelium. However, we found  
287 that in non-infected area, E6AP was predominantly cytoplasmic in the basal layer (figure 4H). From  
288 the second layer and the above, E6AP nuclear localization became progressively more evident. In the  
289 lesion area where the papilla starts to present, there was significant reduction of nuclear E6AP in the  
290 upper layers. Additionally, the cytoplasmic E6AP in the basal layer was decreased in comparison to  
291 the non-infected area. Overall, there was a general reduction in E6AP protein abundance in the lesion.  
292 This agrees with previous findings that E6 can induce the auto-ubiquitination of E6AP and its  
293 degradation (Kao et al., 2000). Further, our *in vitro* studies showed that NIKS cells stably expressing  
294 either 11E6 or 16E6 had lower E6AP protein levels compared to control cells (figure 4-supplementary  
295 1A). In 3D organotypic rafts, reduction of E6AP was identified throughout the bottom and upper layers  
296 (figure 4-supplementary1B). In addition, NHERF1 was mostly expressed from the second layer and  
297 upper layers in non-infected area, which displayed a cytoplasmic and perinuclear pattern (figure 4I).  
298 There were a few basal cells found expressing NHERF1. However, NHERF1 levels were remarkably  
299 decreased in the lesion, supporting previous literature that E6 degrades NHERF1 in various cell lines  
300 (Accardi et al., 2011; Drews et al., 2019).

301

302

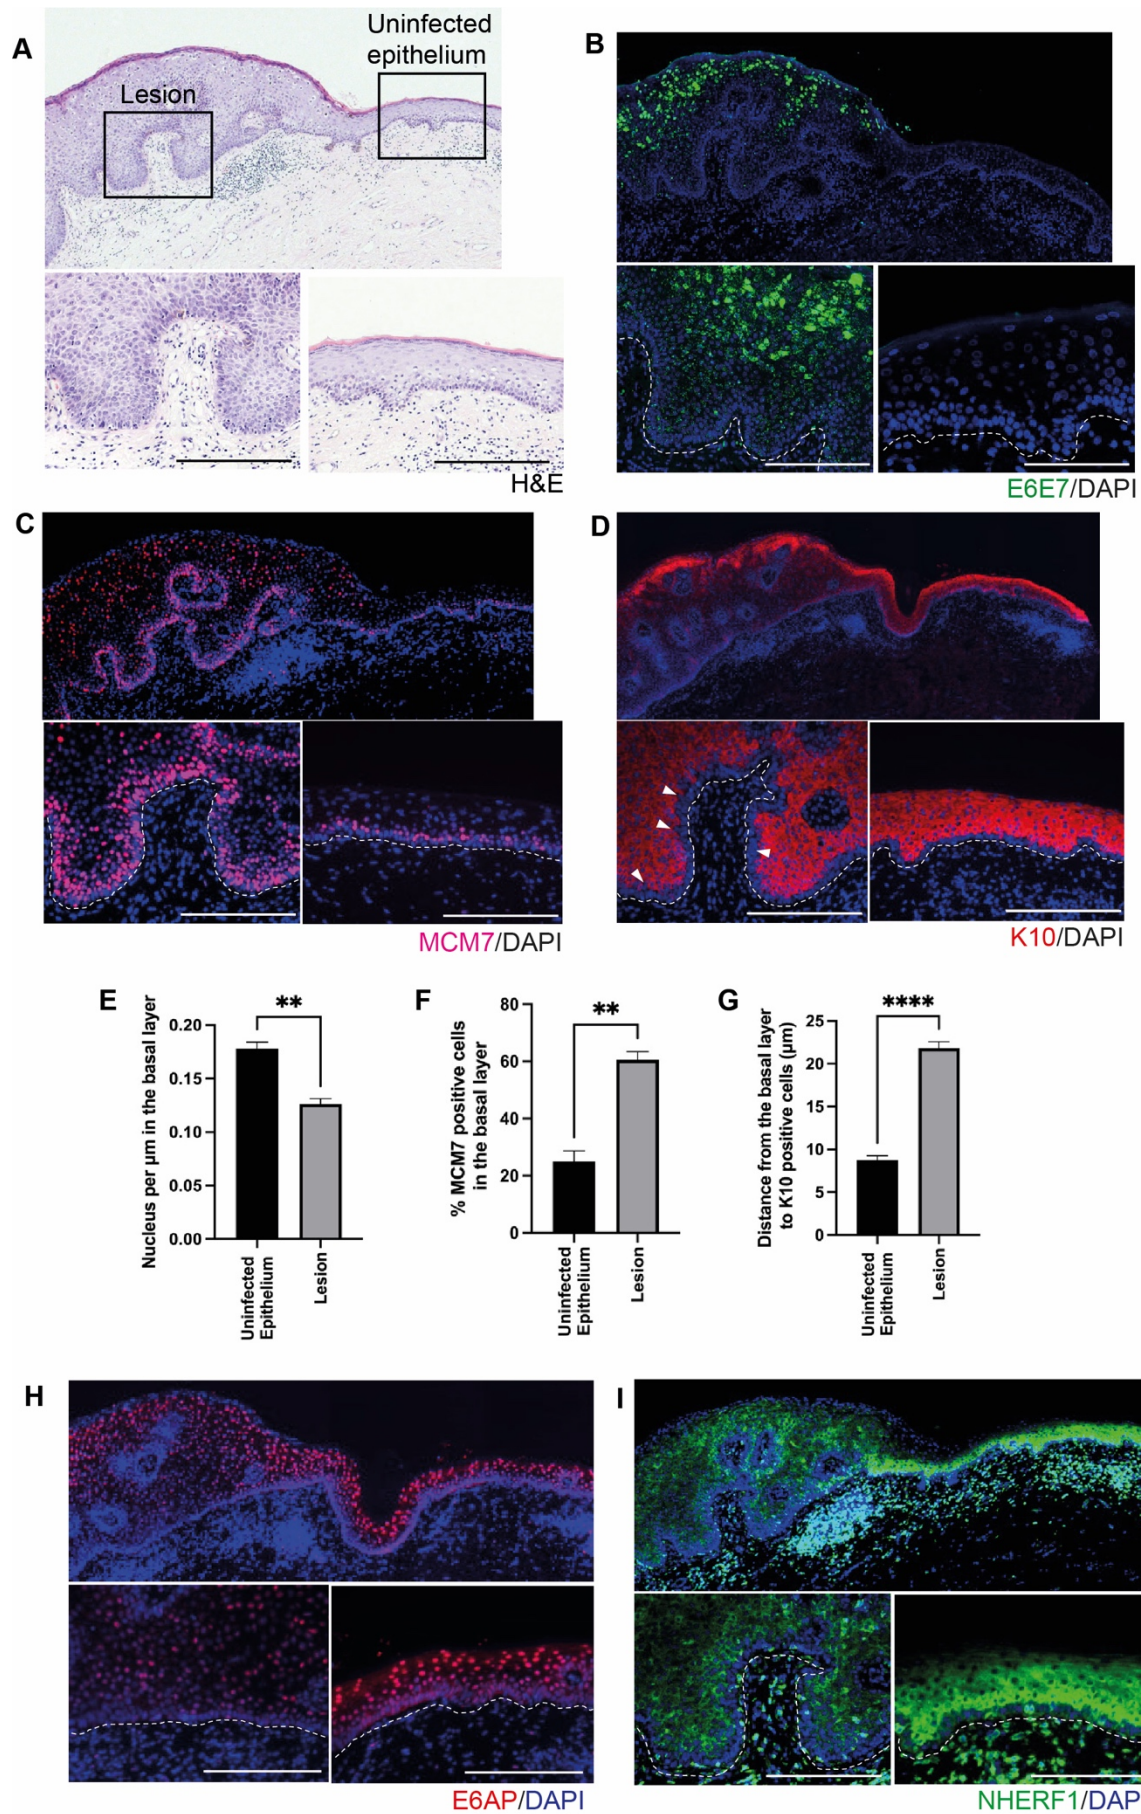

304 **Figure 4. Localisation and expression pattern of E6/E7 and its targets during HPV11 productive**  
305 **lifecycle in condyloma acuminatum.** (A) H&E staining of condyloma acuminatum biopsy with  
306 enlargement areas of lesion (left) and non-infected epithelium (right). (B-D) E6/E7 RNAScope, MCM7  
307 and K10 immunofluorescence staining was carried out on adjacent sections. Nuclei were  
308 counterstained with DAPI (blue). The scale is shown with a white bar (200  $\mu\text{m}$ ). Enlargement images  
309 are shown at the bottom, lower left is the lesion and lower right is the non-infected area. The dotted  
310 lines indicate the position of the basal layer. (E-G) The graphs show quantification of cell density  
311 (nucleus per  $\mu\text{m}$ ) (E), % MCM positive cells in the basal layer (F) and distance between the basal lamina  
312 to the bottom of k10 positive cells ( $\mu\text{m}$ ) are presented in column graphs. Quantification is done by  
313 manually counting cells with Image J. Graphs show mean values  $\pm$  standard errors of at least three fields  
314 from condyloma biopsies. P values were calculated with student t tests. \*\*,  $P \leq 0.01$ ; \*\*\*\*,  $P \leq 0.0001$ .  
315 (H-I) E6AP and NHERF1 protein expression in infected (lower left) and non-infected (lower right) region  
316 of the biopsy. The scale is shown with a white bar (200  $\mu\text{m}$ ).

317

#### 318 **E6 regulates YAP localization and phosphorylation level via E6AP and NHERF1**

319 YAP has been identified as a critical modulator in sensing cell density to regulate cell proliferation, and  
320 has been shown to have important functional roles in keratinocyte homeostasis (Corley et al., 2018;  
321 Elbediwy et al., 2016; Zhao et al., 2007). YAP localization is mainly regulated through phosphorylation  
322 by LATS1/2 (Bernascone & Martin-Belmonte, 2013). At high cell density, a major phosphorylation of  
323 YAP occurs on the position Serine 127 (Ser127), leading to YAP sequestration in the cytoplasm (Zhao  
324 et al., 2010). At low cell density, YAP is not phosphorylated and enters the nucleus to activate  
325 downstream genes (M. K. Kim et al., 2018). Past work has demonstrated that high-risk HPV E6 proteins  
326 regulate the Hippo signalling cascade during the progression to cervical cancer (He et al., 2015).  
327 However, we believe both low-risk and high-risk E6 proteins manipulate YAP activity in low-grade  
328 lesions to adjust homeostasis. Therefore, we examined the localisation and abundance of YAP in the  
329 condyloma tissue by using antibody that specifically recognises the non-phosphorylated (active) form



330 of YAP1 (figure 5A). In non-infected epithelium, YAP is predominately nuclear when it is present in the  
331 basal cells. This is consistent with the observations from previous reports (Elbediwy et al., 2016;  
332 Vincent-Mistiaen et al., 2018; Xiao et al., 2014). Nuclear YAP gradually decreased in the suprabasal  
333 and upper layers and became more prominent in the granular or cornified layer. By comparison, the  
334 number of cells with prominent level of YAP increased in the basal layer in the infected area,  
335 suggesting a subtle modulation of homeostasis towards proliferation. Ser127 YAP was found  
336 significantly decreased in the basal and suprabasal layers, whereas relatively high-level expression of  
337 ser127 YAP is observed in non-infected tissue (figure 5B). This implicates HPV viral gene expression in  
338 the basal layer modulates YAP nuclear-cytoplasmic shift.

339

340 In parallel, NIKS transduced with retroviral expression vectors encoding either 11E6 or 16E6 were used  
341 to grow organotypic cultures, which displayed higher level of nuclear YAP in the basal layer of the rafts  
342 relative to parental NIKS raft (figure 5C), supporting our observations in condyloma tissues. To study  
343 how E6 overcomes the impact of contact inhibition through YAP activation, we seeded FUCCI NIKS  
344 cells expressing E6 or E6 mutants at post-confluence and stained with active YAP. 11E6 and 16E6 both  
345 led to enhanced nuclear YAP relative to NIKS-EV, whereas the E6 mutants 11E6<sup>W133R</sup>, 11E6<sup>L111Q</sup>,  
346 11E6<sup>L70A</sup>, 16E6<sup>L50G</sup> and 16E6<sup>F69A</sup> lost the ability to retain YAP in the nucleus (figure 5D, figure 5-  
347 supplementary1). This suggests that E6AP and NHERF1 are involved in YAP nuclear localisation. Also,  
348 E6-expressing NIKS cells had reduced Ser127 YAP levels at post-confluence, whereas the mutant cell  
349 lines had similar levels of Ser127 YAP as NIKS-EV (figure 5E-F). This further implies that E6 requires  
350 NHERF1 and E6AP binding to promote YAP nuclear localisation at post-confluence, and this leads to  
351 the reduction of phosphorylated YAP in cytoplasm.

352

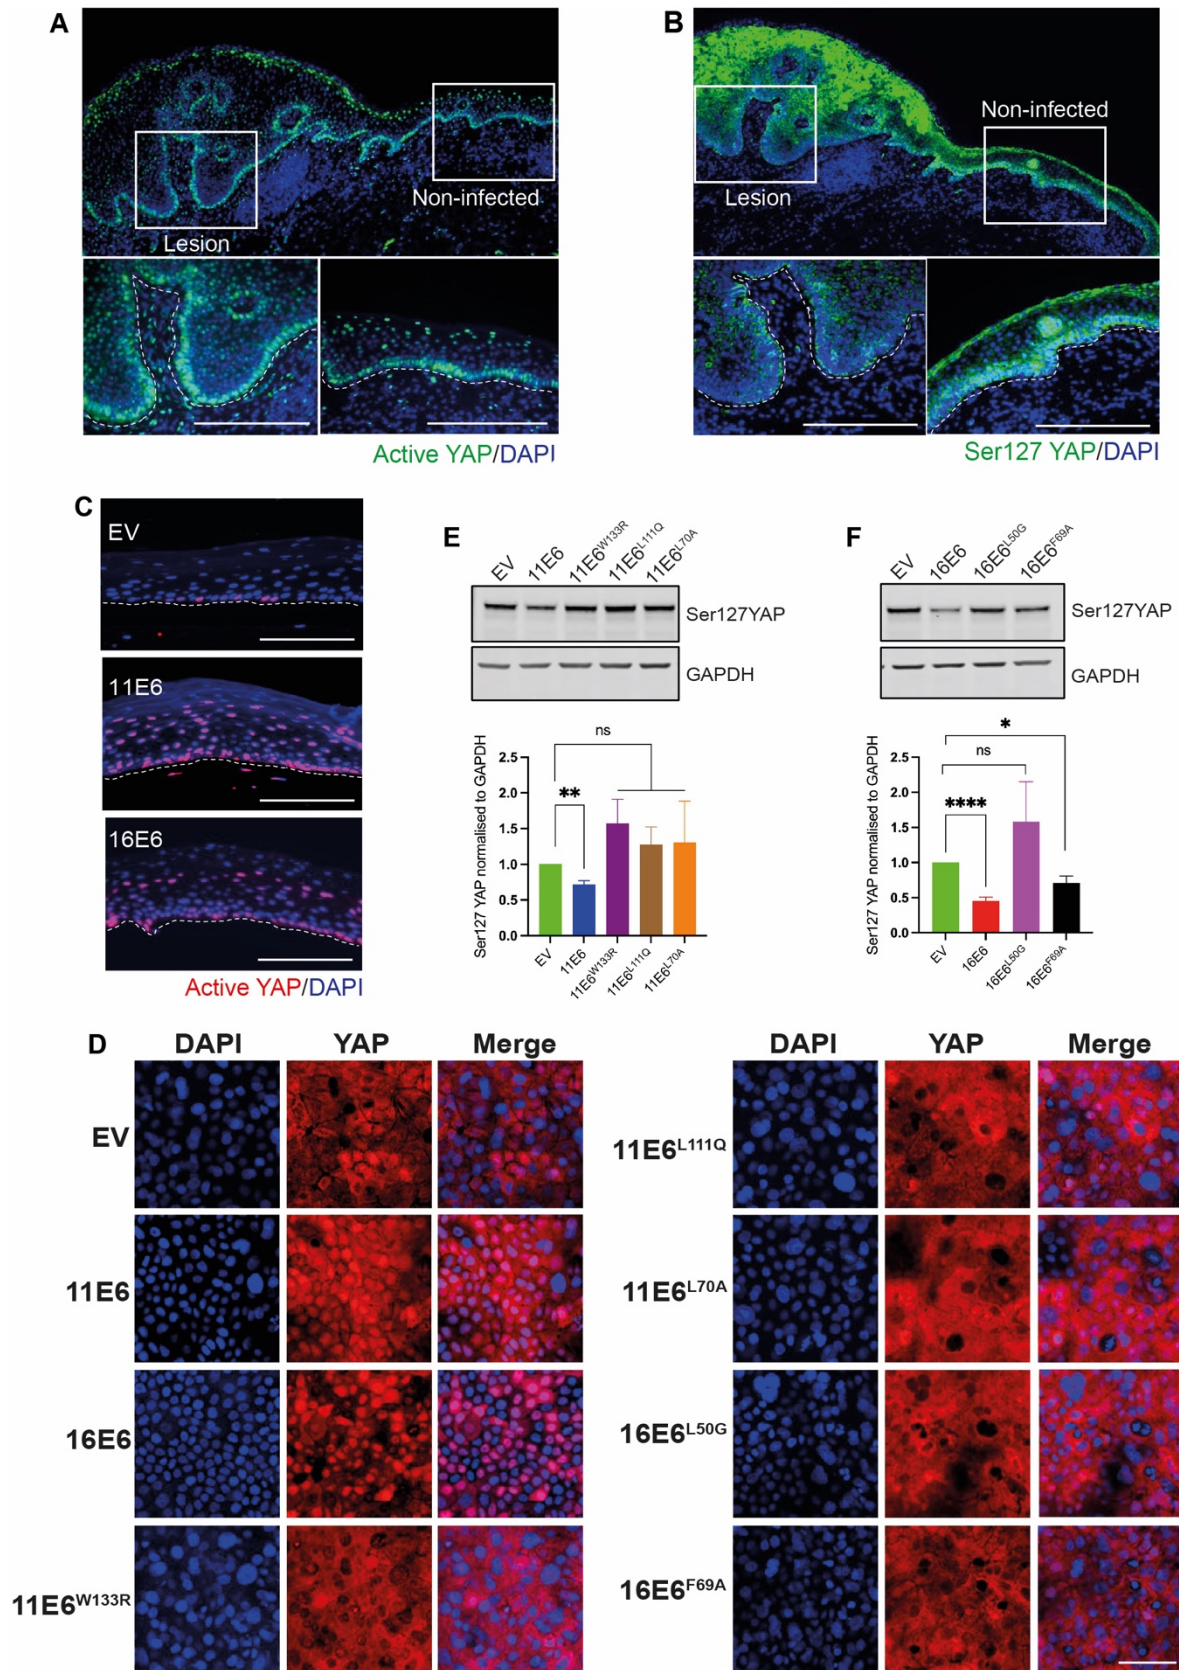

353

354

355 **Figure 5. HPV E6 requires E6AP and NHERF1 to enhance YAP nuclear localisation.** (A-B) Active YAP  
356 antibody (Abcam, ab205270) that recognizes un-phosphorylated form of YAP and p-YAP (Ser127)  
357 antibody (Cell signalling, 4911) that only recognizes YAP phosphorylated at position Serine 127 were  
358 stained on condyloma biopsy. Nuclei were stained with DAPI. Specific areas of lesions and non-  
359 infected are shown as enlargement images at the bottom, lower left is the lesion and lower right is  
360 the non-infected epithelium. (C) Organotypic rafts of NIKS transduced with retroviral vectors encoding  
361 EV, 11E6 and 16E6 were established, sectioned and stained with active YAP antibody. The scale for all  
362 images is shown with a white bar (200  $\mu$ m). (D) NIKS transduced with retroviral vectors encoding EV,  
363 11E6, 16E6, 11E6<sup>W133R</sup>, 11E6<sup>L111Q</sup>, 11E6<sup>L70A</sup>, 16E6<sup>L50G</sup>, 16E6<sup>F69A</sup> were fixed at post-confluence, followed  
364 by staining with active YAP antibody and DAPI. Scale = 100  $\mu$ m. (E-F) NIKS cells at post-confluence  
365 were collected and whole-cell lysates were subjected to Western blot analysis for P-YAP (Ser127). In  
366 all quantified Western blotting results, representative blots are shown. Data are means  $\pm$  standard  
367 errors of three biological replicates. \*\*\*\*P < 0.0001, \*\*P < 0.01 (two-tailed Student's t test), ns, not  
368 significant.

369

### 370 **E6AP is important for cell differentiation**

371 Based on the results shown above, our work demonstrates that E6AP plays an important role in E6-  
372 regulated homeostatic phenotypes in keratinocytes. Accumulating evidence shows that Alpha group  
373 E6 binding to E6AP leads to the activation of its ubiquitin ligase activity and degradation (Brimer et al.,  
374 2017; Kao et al., 2000). Together with our results, it prompts the hypothesis that E6 may regulate the  
375 natural cellular targets of E6AP through directly targeting E6AP for degradation. This prompted us to  
376 generate NIKS cells transduced with shRNA oligonucleotides targeting E6AP. The knockdown effect  
377 was validated with western blot (figure 6A). NIKS-shRNA-luciferase (control) and NIKS-shRNA-E6AP  
378 cells were plated at cell densities ranging from pre-confluence to post-confluence. After 72 hours, cells  
379 were fixed and stained with K10. NIKS-shRNA-E6AP cells displayed higher saturation density (13,000  
380 cells/field) and delay of K10 expression in comparison to the control NIKS (figure 6A). At the same cell

381 density, NIKS cells positive in the proliferation marker MCM7 cells were increased, whereas NIKS cells  
382 expressing K10 were significantly reduced (figure 6B-C). This provides evidence that E6AP contributes  
383 to the balance of proliferation-differentiation switch in keratinocytes. Further, NIKS organotypic rafts  
384 with E6AP knocked down were established, which allowed us to examine K10 expression in different  
385 layers. We found a slight delay of k10 expression in the second layer of the raft expressing shRNA E6AP  
386 (figure 6-supplementary 1).

387

388 In parallel, NIKS cell lines with E6AP knocked out by CRISPR-Cas9 were established. Three clonal E6AP<sup>-</sup>  
389 <sup>-</sup> NIKS cell lines with genome edited by gRNA1 were selected. Sequencing of the genomic region  
390 targeted by the gRNA confirmed frameshift mutations had been introduced into each allele and no  
391 wild-type (WT) allele remained. Consistent with this, immunoblotting showed loss of E6AP expression  
392 (figure 6D). A control NIKS cell line expressing gRNA targeting a random rice gene was also established  
393 alongside and underwent single cell selection. The E6AP<sup>-</sup> NIKS cell lines were then plated in cell  
394 densities ranging from pre-confluence to post-confluence. After 72 hours, cells were fixed and stained  
395 with K10 (figure 6E). Three E6AP<sup>-</sup> NIKS cell lines all reached higher saturation densities, from 12,000  
396 cells/field to 17,000 cells/field in comparison to the control cell line (8000 cells/field). K10 expression  
397 was remarkably reduced in E6AP<sup>-</sup> NIKS cells after saturation density was reached. Comparing at  
398 similar cell densities, K10 expression was significantly lower and %MCM7 positive cells was increased  
399 (figure E-F). These results support our observations in NIKS-shRNA-E6AP cells and demonstrate the  
400 potential role of E6AP in epithelial homeostasis.

401

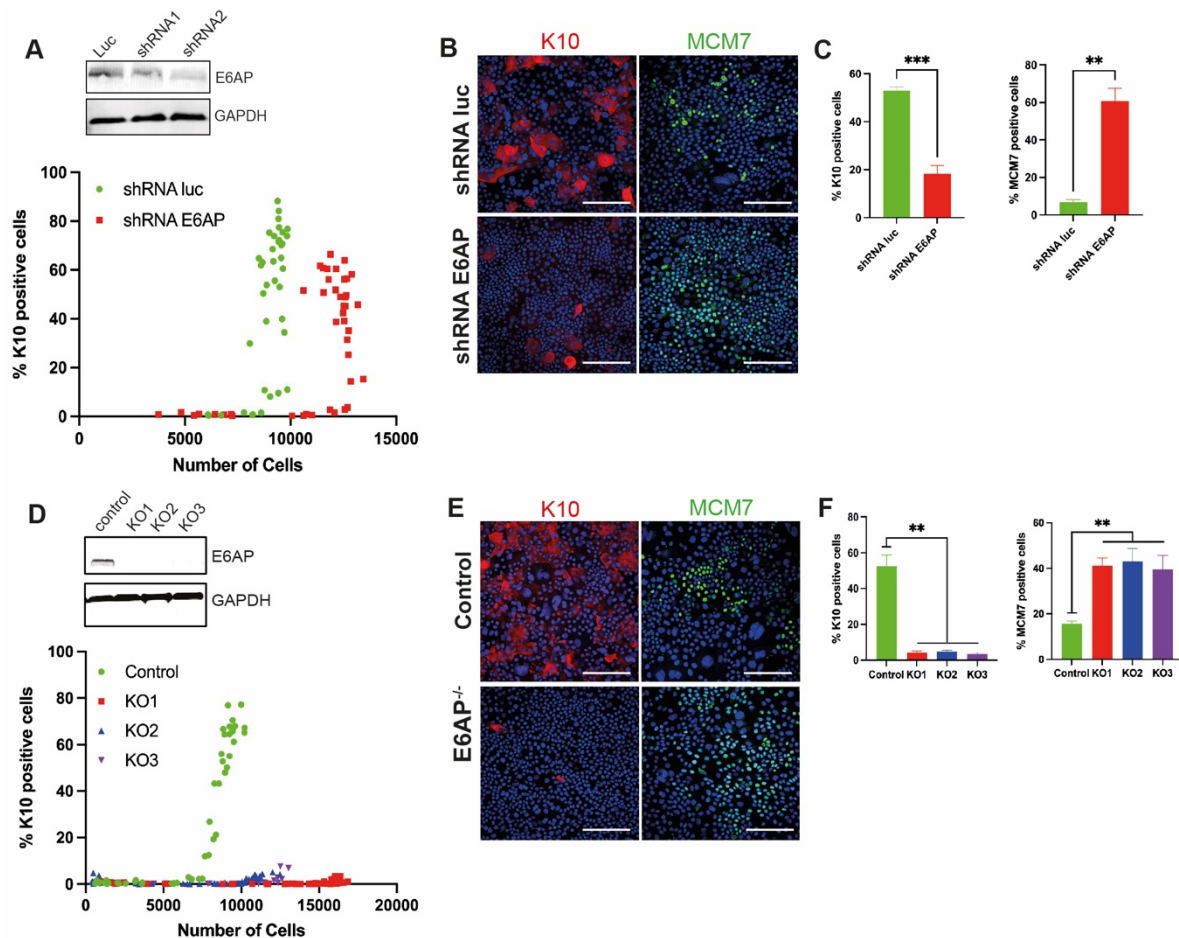

402

403

404 **Figure 6. E6AP is a critical regulator of keratinocyte differentiation.** (A) E6AP was knocked out in NIKS

405 cells by transfecting cells with px459 plasmid expressing E6AP gRNA. Puromycin and single cell

406 selection was carried out to obtain three independent KO clones. The control cells were NIKS cells

407 transfected with px459 plasmid expressing gRNA targeting a non-existing gene in mammalian cells.

408 Western blot indicates the loss of E6AP in NIKS<sup>E6AP<sup>-/-</sup></sup> cells. Control and knockout cell lines were plated

409 at different densities and fixed after 72 hours. Cells were then stained with K10 and DAPI. % K10

410 positive cells was plotted against the number of cells per field. (B-C) Control and NIKS<sup>E6AP<sup>-/-</sup></sup> cells at

411 post-confluence were stained with K10 (red) and MCM7 (green). % K10 positive cells and % MCM7

412 positive cells were quantified for at least three representative images, mean values  $\pm$  standard errors

413 are shown in the graphs. Student t-test was performed between each group. (D) NIKS cells were

414 retrovirally transduced with plasmids expressing shRNA targeting E6AP or Luciferase. Cells were then

415 selected with puromycin and validated with western blot. Cells were plated at different densities and  
416 after 72 hours, cells were stained with K10 and DAPI. % K10 positive cells was plotted against the  
417 number of cells per field. (E-F) NIKS-shRNA-luc and NIKS-shRNA-E6AP cells at post-confluence were  
418 stained with K10 (red) and MCM7 (green). % K10 positive cells and % MCM7 positive cells were  
419 quantified for at least three representative images, mean values  $\pm$  standard errors are shown in the  
420 graphs. Student t-test was performed between each group.

421

422 **E6 requires E6AP depletion to impair differentiation gene expression and activate YAP target genes**  
423 **in keratinocytes.**

424 To establish which cellular pathways are affected following E6AP loss in keratinocytes under condition  
425 which differentiation would normally be triggered, total RNA was isolated from three independent  
426 samples of NIKS-control and NIKS E6AP<sup>-/-</sup> cells that grew until post-confluence. With the standard  
427 mRNA read depth of around 20 million reads/sample, 3824 genes were differentially expressed with  
428 fold-change  $\geq 2$  and adjusted  $P \leq 0.05$  in E6AP<sup>-/-</sup> cells (figure 7-supplementary 1A). Of these, 1664  
429 genes were down-regulated and 2160 genes were upregulated in the absence of E6AP. In the gene  
430 enrichment analysis, more than half of the down-regulated genes were in keratinocyte differentiation-  
431 related GO categories (figure 7A and B). These included cornification, keratinisation, epidermis  
432 development, keratinocyte differentiation, skin development and epidermal cell differentiation. We  
433 selected a subset of markers of keratinocyte differentiation, such as keratin 1, keratin 4, keratin 10,  
434 keratin16 and involucrin for validation by qRT-PCR. These genes were all significantly downregulated  
435 in E6AP<sup>-/-</sup> cells (figure 7C). KRT1, KRT4, KRT10, and KRT16 are cytokeratins associated with the  
436 suprabasal layers of differentiating keratinocytes (Sharma et al., 2019; Werner et al., 2020). Involucrin  
437 (IVL) is also a marker for keratinocyte differentiation commitment which expresses at high levels in  
438 the suprabasal layers of the epidermis before cornification occurs (Sanchez-Danes & Blanpain, 2018).  
439

440 Additionally, relevant GO categories upregulated by E6AP<sup>-/-</sup> included regulation of signalling receptor  
441 activity, extracellular matrix organisation and cell-cell adhesion etc (figure 7-supplementary 1C).  
442 Among these GO terms, we found a subset of YAP target genes were significantly upregulated (figure  
443 7B). qPCR was then performed to quantify to verify the relative abundance of YAP downstream gene  
444 expression. Consistent with the RNA-seq outcome, well-characterised YAP target genes *AREG*, *PLAU*,  
445 *PTGS2*, *AXL* and *CTGF* that were described in previous literature (Corley et al., 2018; Franklin et al.,  
446 2020; H. Kim et al., 2021; Li et al., 2020), were expressed at 2- to 20-fold higher levels when E6AP was  
447 depleted (figure 7C). All these genes have indicated functions in driving cell proliferation.

448

449 Given our finding that E6 requires E6AP binding to promote YAP nuclear localisation (figure 5), we  
450 hypothesised that E6 inhibits E6AP function to activate specific YAP target genes. Total RNA was  
451 extracted from NIKS-control and NIKS cells stably expressing either 11E6 or 16E6 that grew until post-  
452 confluence to trigger differentiation, and sent for RNA sequencing. For the GO enrichment analysis,  
453 both 11E6 and 16E6 downregulated differentiation-related processes including cornification,  
454 keratinisation, keratinocyte differentiation etc (figure 7 supplementary 1C). At the same time, cell  
455 cycle-related processes including G2/M phase transition, G1/S phase transition and cell division were  
456 upregulated (figure 7 supplementary 1C). These results correlate to the increased proliferation and  
457 delayed differentiation of NIKS cells under the expression of E6 presented above (figure 1). All the YAP  
458 target genes upregulated in E6AP<sup>-/-</sup> cells were also found to be activated in E6-expressing NIKS cells,  
459 including *PTGS2*, *AXL*, *CYR61*, *CTGF* and *AREG* (figure 7C). To confirm that E6AP degradation is required  
460 for YAP target gene activation, NIKS cells expressing E6 or the mutants were seeded at high cell density  
461 and the mRNA abundance was quantified by RT-qPCR. Indeed, 11E6<sup>W133R</sup>, 11E6<sup>L111Q</sup> and 16E6<sup>L50G</sup> which  
462 cannot induce E6AP degradation had reduced ability to upregulate YAP-responsive genes (figure 7C).  
463 Interestingly, RNA-seq and qPCR results suggest that NHERF1 gene (*SLC9A3R1*) downregulation is  
464 found in E6-expressing and E6AP<sup>-/-</sup> NIKS cells (figure 7D). Thus, NHERF1 is not only degraded by E6-  
465 E6AP complex but also downregulated by E6 at transcriptional level. It is possible that NHERF1

466 reduction directly controls YAP transcriptional activity, because E6 mutants 11E6<sup>L70A</sup> and 16E6<sup>F69A</sup>  
 467 cannot upregulate YAP target genes.

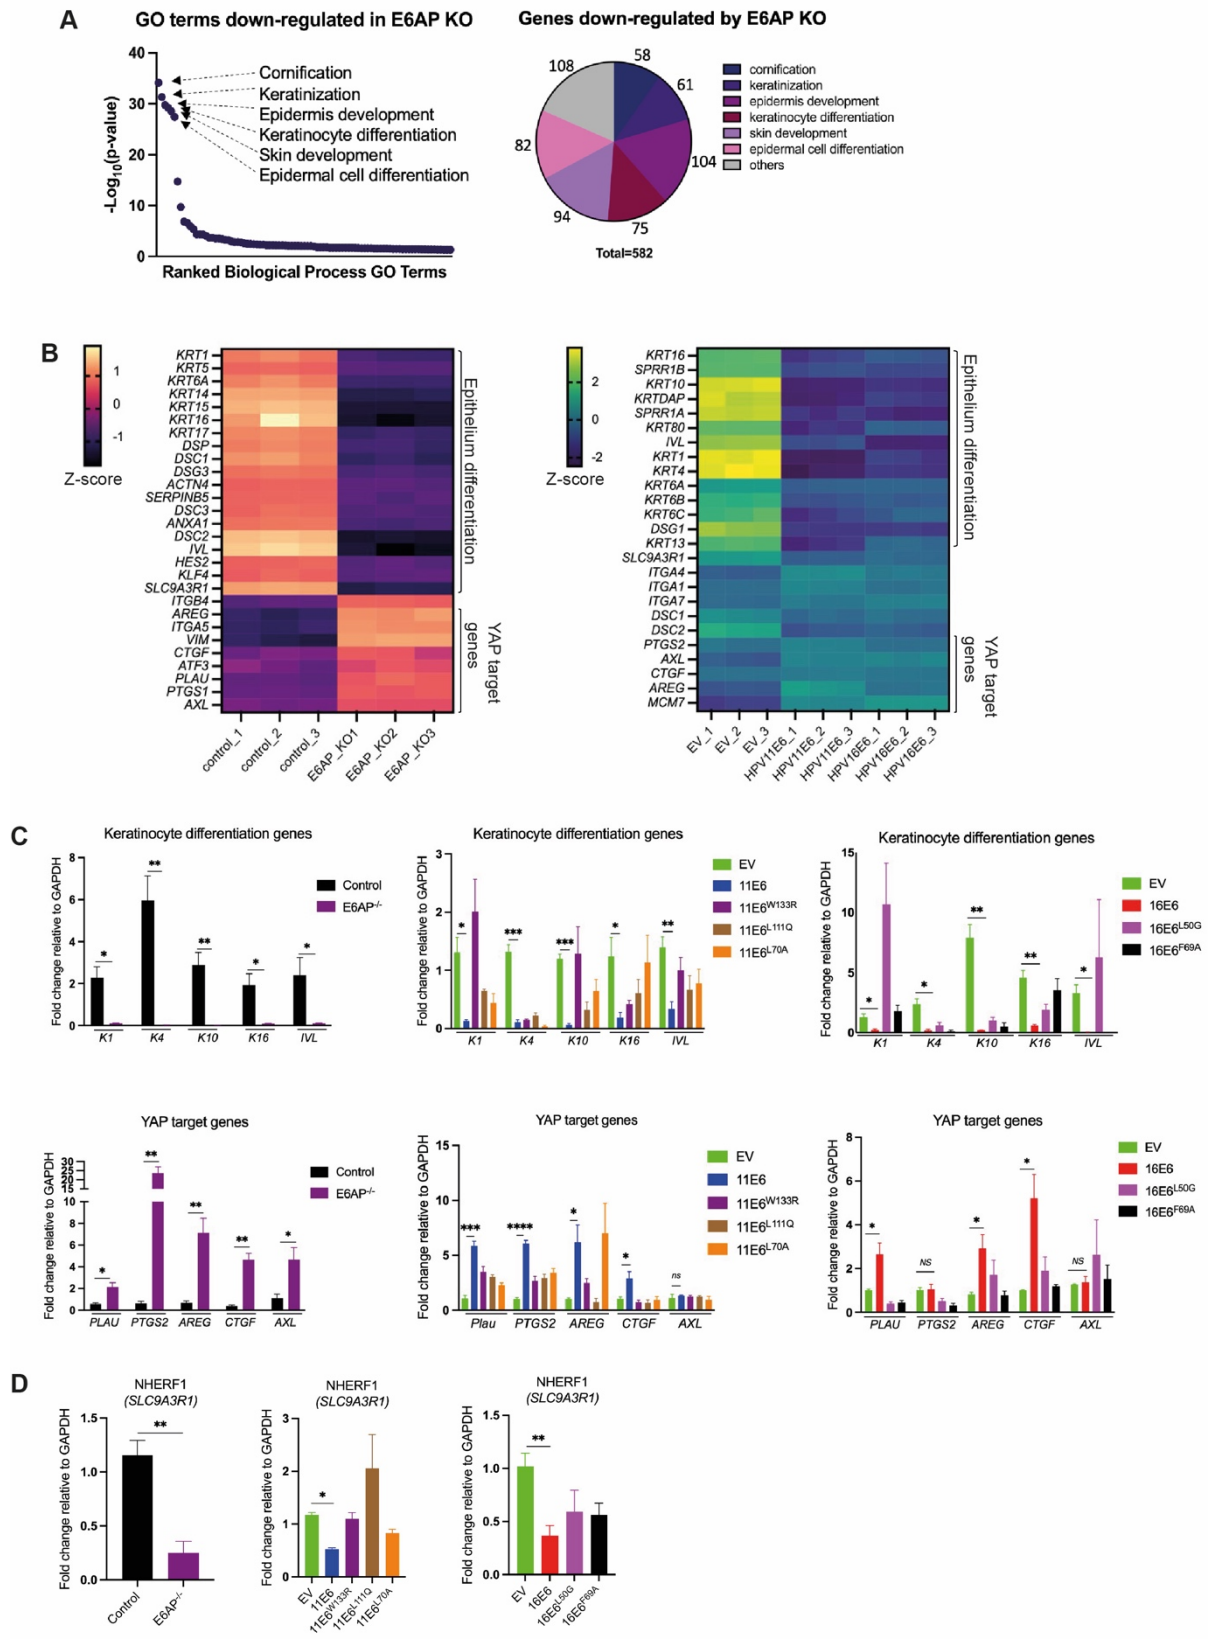

468

469



470 **Figure 7. E6 requires E6AP depletion to impair differentiation gene expression and activate YAP**  
471 **target genes in keratinocytes.** Total RNA was extracted from NIKS control, NIKS E6AP<sup>-/-</sup> and NIKS  
472 transduced with EV, 11E6 or 16E6 when the cells reached post-confluence. PolyA selected RNA was  
473 analyzed by RNA-seq. (A) GO enrichment analysis of genes down-regulated in NIKS E6AP<sup>-/-</sup> compared  
474 with NIKS-control. Pie chart displays the fraction of genes down-regulated in the absence E6AP that  
475 fall into enriched GO Terms. (B) FPKM (expected number of Fragments Per Kilobase of transcript  
476 sequence per Millions base pairs sequenced) values were calculated to estimate gene expression  
477 levels from RNA-seq results. Selected epithelium differentiation genes and YAP-responsive genes that  
478 was significantly differentially expressed are shown in the heatmap. The legend shows the range of  
479 Log<sub>2</sub> (FPKM+1) values of genes that are homogenised across the row (Z-score). Complete set of  
480 heatmap is shown in supplementary file 2. (C) Transcript abundance for keratinocyte differentiation  
481 genes or YAP target genes was measured in NIKS-control, NIKS E6AP<sup>-/-</sup>, NIKS-EV, NIKS-11E6, NIKS-  
482 11E6<sup>W133R</sup>, NIKS-11E6<sup>L111Q</sup>, NIKS-11E6<sup>L70A</sup>, NIKS-16E6, NIKS-16E6<sup>L50G</sup>, NIKS-16E6<sup>F69A</sup> by qRT-PCR. Bar  
483 graphs display mean +-standard errors of three independent experiments. \*\*\*P < 0.001, \*\*P < 0.01  
484 (two-tailed Student's t test), \*P < 0.05, ns, not significant. (D) NHERF1 (*SLC9A3R1*) mRNA level was  
485 quantified by qPCR in three independent experiments.

486

487

488

489

490

491

## 492 Discussion

493 Human papillomaviruses establish chronic lesions in the epithelium (Doorbar et al., 2012; Stanley,  
494 2012). During evolution, HPVs became adapted to niches through manipulating molecular processes  
495 and hence developed distinct tissue tropisms (Doorbar et al., 2021; Kranjec & Doorbar, 2016). For  
496 example, the Alpha genus E6 preferentially bind to E6AP whereas E6 from the other genera confer  
497 stronger interaction with MAML (Brimer et al., 2012, 2017; Tan et al., 2012). In both instances, this  
498 leads to the inhibition of Notch signalling and delay of terminal differentiation program (Kranjec et al.,  
499 2017; Meyers et al., 2017; Tan et al., 2012). Recent published work on MmuPV and high-risk E6 has  
500 indicated that E6 rather than E7 has a dominant role in inducing cell competition and promotes basal  
501 cell retention (Brimer & Vande Pol, 2022; Saunders-Wood et al., 2022). Also, our previous work have  
502 demonstrated that low-risk E6 is the main driver for keratinocyte proliferation, and it plays a major  
503 role in delaying keratinocyte committing to differentiation (Kranjec et al., 2017; Murakami et al., 2019).  
504 Therefore, accumulating evidence suggests that E6 proteins have conserved functions in modulating  
505 the balance between cell proliferation and differentiation that are crucial for HPV-infected lesion  
506 expansion and persistence. Thus, our work firstly dissected the shared functions between high- and  
507 low-risk HPV E6 and found that they target similar homeostatic processes, in both cases E6AP serves  
508 an important role.

509 In this study, our results clearly show that high or low-risk E6 expression increased the proportion of  
510 cycling cells at both pre-confluence and post-confluence (figure 1). Because E6 has a prominent role  
511 in overcoming normal keratinocyte contact inhibition (Kranjec et al., 2017; Luna et al., 2021; Zheng et  
512 al., 2022), cells expressing E6 typically reached a higher saturation density than the control cells.  
513 Nevertheless, 16E6-expressing cells always reach higher saturation density whereas 11E6-expressing  
514 cells reach lower density. Similarly, NIKS transduced with either E6 typically start to show K10  
515 expression at higher cell density, with 11E6 causing the intermediate phenotype between the control  
516 and 16E6. With cell-cell competition assays, we examined the progression of E6-expressing cell

517 phenotype from the first layer to the second layer. This is in line with current thinking that E6  
518 expression retains keratinocyte in the bottom layer and delays delamination, while the wild type NIKS  
519 cells were displaced and entered the second layer. Although 11E6 appeared to have the intermediate  
520 phenotype, they share a basic set of functions to modulate cellular phenotypes involved in  
521 homeostasis. In both cases, E6AP plays an important role. The more subtle cellular phenotypes caused  
522 by 11E6 expression comparing to 16E6 could be partially due to their different modes of interaction  
523 with E6AP. It was suggested that 11E6 and 16E6 bind to various auxiliary regions on E6AP that lead to  
524 distinct substrate degradation (Drews et al., 2020). For example, 11E6 cannot cause p53 degradation  
525 but degrades NHERF1 in a similar way as 16E6. Also, in both previous *in vitro* binding or co-  
526 immunoprecipitation studies, interaction between 11E6 and E6AP has shown to be weaker than 16E6-  
527 E6AP binding (Brimer et al., 2007; Cooper et al., 2003).

528 Currently, Hippo signalling has emerged as one of the key pathways being altered frequently in HPV-  
529 related cancers (Olmedo-Nieva et al., 2020). It has been suggested that high-risk E6 requires the PDZ  
530 motif to promote YAP nuclear localisation in serum-starved keratinocytes (Webb Strickland et al.,  
531 2018). High-risk E6 was also shown to drive cervical cancer cell proliferation by maintaining high levels  
532 of YAP in cells and YAP expression is correlated with cervical cancer progression (He et al., 2015). More  
533 recently, high risk HPV E7 was proposed to activate YAP1 in basal keratinocytes by degrading PTPN14,  
534 which contributes to papillomavirus persistence and carcinogenesis (Hatterschide et al., 2019, 2022).  
535 Despite its critical involvement in carcinogenesis, YAP is also required for normal skin homeostasis  
536 (Akladios et al., 2017; Georgescu et al., 2016). Proliferation of basal layer cells was significantly  
537 reduced in YAP/TAZ double knockout mouse skin (Elbediwy et al., 2016). Our finding revealed that  
538 YAP1 nuclear translocation can be promoted by low-risk 11E6 as well, and this is achieved through  
539 E6AP binding, suggesting YAP1 activation is involved during both low-risk and high-risk HPV infections  
540 (figure 5). Highly conserved feature of E6 binding to E6AP indicates that YAP1 activation and  
541 maintenance of basal cell state is likely shared among diverse Alpha genus E6 proteins. RNA

542 sequencing performed on basal layer human keratinocytes indicate that YAP transcriptional regulation  
543 is active exclusively in the basal cell population (Elbediwy et al., 2016). This correlates with our  
544 observation that active YAP expression is mostly identified in the basal layer of condyloma section and  
545 upregulated in the presence of low-risk HPV infection (figure 5). Further, RNA sequencing and qPCR  
546 validation demonstrated that YAP downstream genes were activated in the presence of either 11E6  
547 or 16E6. Loss of E6AP binding abolished E6 function in YAP downstream gene upregulation (figure 7).  
548 Our results are consistent with previous findings that *PLAU* and *PTGS2* are positively regulated by  
549 constitutive YAP activity in proliferating keratinocytes in the mouse skin in vivo, and in HaCat  
550 keratinocytes grown in vitro (Corley et al., 2018). Thus, both E6 drive keratinocyte proliferation  
551 through activating YAP downstream genes. It was recently shown that YAP/TAZ regulates  
552 differentiation genes in keratinocytes in the basal layer of organotypic raft culture (Hatterschide et al.,  
553 2022). In addition, YAP activation crosstalk with the Notch signalling by upregulating *DLL1*, *JAG2* and  
554 *DLL3* ligands, leading to cell-autonomous cis-inhibition of Notch (Totaro, Panciera, et al., 2018). This  
555 allows epidermal progenitors to maintain in an undifferentiated state. All of these ligands were found  
556 upregulated in our RNA-seq results for E6-expressing keratinocytes. Thus, the local microenvironment  
557 is dynamic regulated by E6 to orchestrate spatial control of self-renewal verses differentiation of basal  
558 layer progenitor cells.

559 Alpha genus E6 proteins deplete E6AP to different extent by inducing the self-ubiquitination and  
560 degradation of E6AP (Brimer et al., 2017; Kao et al., 2000). Importantly, our clinical observations show  
561 that in the basal layer where E6/E7 viral genes are expressed, a reduction of cytoplasmic E6AP was  
562 observed in comparison to uninfected epithelium. In the upper layers, although E6AP accumulates in  
563 the nucleus, its abundance is noticeably less prominent in the presence of amplified E6/E7 expression  
564 (figure 4). This is the first description of E6AP pattern in human tissue, which agrees well with our *in*  
565 *vitro* work that NIKS cells transduced with E6 led to decreased endogenous E6AP protein level (figure  
566 4 supplementary 1). However, the consequence of E6AP degradation in the context of HPV life cycle

567 and epithelium homeostasis has not been fully understood. Our results showed that loss of E6AP  
568 binding diminished a major component of both high and low-risk E6 functions in driving cell cycle entry,  
569 delaying differentiation, overcoming contact inhibition and basal cell retention (figure 2-3). Because  
570 high-risk E6 targets p53 to delay keratinocyte differentiation, low-risk E6 that cannot lead to p53  
571 degradation may target E6AP directly. Our shRNA-E6AP and E6AP<sup>-/-</sup> cell lines both demonstrated that  
572 E6AP is required for normal keratinocyte differentiation program and its depletion leads to less cells  
573 committing to differentiation and mostly remain in proliferative state. Additionally, past literature  
574 suggests that E6AP has impact on cell cycle control and proliferation (A Mishra & Jana, 2008; Amit  
575 Mishra et al., 2009; Srinivasan & Nawaz, 2011).

576 It is possible that E6 regulates the levels of natural cellular targets of E6AP through inducing its  
577 degradation. On the other hand, E6 modifies E6AP substrate specificity to degrade other cellular  
578 proteins can still contribute to the phenotypes we observed. Certainly, E6AP and NHERF1 are both  
579 depleted in cells expressing either 11E6 or 16E6. Also, NHERF1 expression level goes down in the  
580 absence of E6AP (figure 7). RNA-seq results showed the resemblance of E6-expressing and E6AP<sup>-/-</sup>  
581 keratinocytes that both displayed lower expression of keratinocyte differentiation-related genes and  
582 higher level of YAP downstream genes. NHERF1 has been shown to directly interacts with YAP and its  
583 depletion leads to YAP translocation to the nucleus (Georgescu et al., 2016). Either E6 expression or  
584 E6AP knockout results in reduced NHERF1 mRNA expression in our RNA-seq and qPCR results (figure  
585 7). Also, E6 mutants that cannot degrade NHERF1 failed to increase nuclear YAP (figure 5). This  
586 implicates that NHERF1 may also be critically involved in YAP activation.

587 As with the high-risk HPVs, low-risk HPVs are a group of evolutionarily successful viruses that are able  
588 to persist in epithelium basal layer. During lesion maintenance, the high-risk group can progress to  
589 neoplasia whereas the low-risk group cause significant mobility and healthcare burden (Saxena et al.,  
590 2022; Thapa et al., 2018). The current treatment with repeat surgical resection of papillomatous  
591 disease does not address the fundamental underlying issue of chronic infection with low-risk HPV and

592 complete clearance of the reservoir of infected cells becomes more important (Egawa & Doorbar,  
593 2017; R Ivancic et al., 2020; Ryan Ivancic et al., 2018). Despite the disease outcomes, low-risk and high-  
594 risk HPVs modulate similar pathways during lesion expansion and persistence. Successful  
595 establishment of persistent infection is a prerequisite for both low-risk HPV chronic lesion and high-  
596 risk HPV carcinogenesis (Doorbar et al., 2021). Our work discovered new ways of E6 interacting with  
597 cellular proteins to assist lesion maintenance, which shed light on potential therapeutic strategies  
598 such as small molecular inhibitors upon disease elimination.

599

600

601

602

603

604

605

606

607

608

609

610

611

612

613

614

615

616

## 617 **Materials and methods**

### 618 **Cell culture**

619 NIKS (a gift from Paul Lambert, McArdle Laboratory for Cancer Research, University of Wisconsin), a  
620 HPV-negative spontaneously immortalised human keratinocyte cell line, was maintained at sub-  
621 confluence on  $\gamma$ -Irradiated J2 3T3 feeder cells (a gift from Paul Lambert) in F medium with all  
622 supplements as previously described (Flores et al., 1999). 293T (ATCC) were maintained in Dulbecco's  
623 Modified Eagle's Medium (DMEM, SIGMA) supplemented with 10% fetal calf serum (FCS, HyClone)  
624 and 1% penicillin and streptomycin. FUCCI NIKS cells were established by transducing with the FUCCI  
625 cell cycle sensor and FACS sorted for high level expression of Cdt1-mKO2 (G1/G0 phase) and Geminin-  
626 mAG (S/G2/M phase). E6AP KO or mock control cell lines were established by transfection of px459  
627 with sgRNA targeting E6AP or a non-exist gene (supplementary table 1).

### 628 **Plasmid construction and site-directed mutagenesis**

629 pSpCas9(BB)-2A-Puro (PX459)-E6APgRNA plasmid and pSpCas9(BB)-2A-Puro (PX459)-rice gRNA  
630 plasmid were kind gifts from Lawrence banks (Jayashree Thatte, 2018) and Dr. Yongxu Lu from  
631 Department of Pathology, University of Cambridge. Construction of the retroviral vectors pQCXIN-  
632 Flag11E6 and pQCXIN-Flag16E6 were accomplished by cloning the coding sequence using Gateway  
633 Technology (Thermo Fisher Scientific, MA, USA) following manufacturer's instructions. The E6 mutants  
634 pQCXIN-Flag11E6<sup>W133R</sup>, pQCXIN-Flag11E6<sup>L111Q</sup>, pQCXIN-Flag11E6<sup>L70A</sup>, pQCXIN-Flag16E6<sup>L50G</sup>, pQCXIN-  
635 Flag16E6<sup>F69A</sup> were constructed using a KOD-Plus-Mutagenesis Kit (TOYOBO, Japan), prior to DNA  
636 sequencing to ensure that no additional base changes were present. The primer sequences used for  
637 mutagenesis are listed in supplementary table 1. The E6AP-specific shRNA construct pCL-SI-  
638 MSCVpuro-H1R-E6APri4 was described previously (Handa et al., 2007). pBOB-EF1-FastFUCCI-Puro  
639 was a gift from Kevin Brindle & Duncan Jodrell (Addgene plasmid 86849) (Koh et al., 2017).

640

### 641 **Retrovirus and lentivirus transduction**

642 The production and infection of recombinant retroviruses or lentiviruses were accomplished as  
643 previously described (Naviaux et al., 1996; Tani et al., 2019). To generate NIKS cells expressing E6,  
644  $2 \times 10^5$  cells were seeded in each well of a 6-well plate the day before transduction. Cells were  
645 inoculated with viruses at  $\text{MOI} > 1$  in the presence of 4ug/ml of Polybrene (Santa Cruz). Stable NIKS  
646 populations were generated following selection with puromycin (10ug/ml), G418 (50ug/ml) or  
647 hygromycin (10ug/ml).

#### 648 **Organotypic raft culture**

649 Raft cultures were established as previously described (Flores et al., 1999; Lambert et al., 2005). EF-  
650 1F human foreskin fibroblasts were mixed at a concentration of  $10^7$  cells/ml with Rat Tail Collagen  
651 Type I (SLS, 354236) to make the dermal equivalent. Dermal equivalent was allowed to contract in  
652 DMEM for four days before NIKS cells were plated on at a density of  $1.5 \times 10^6$  cells/50ul. Organotypic  
653 rafts were firstly cultured in FC media to allow attachment and expansion, followed by cornification  
654 media (Flores et al., 1999) to facilitate the formation of cornified layer. Rafts were allowed to stratify  
655 for approximately 14 days, then trimmed and fixed in 4% paraformaldehyde (PFA) for 24 hours. Tissue  
656 sectioning was performed by histologist at Department of Pathology, Cambridge.

#### 657 **Immunofluorescence**

658 Immunofluorescence was performed as described previously (Wang et al., 2004). The formalin fixed,  
659 paraffin embedded (FFPE) tissue sections were wax removed with Xylene and incubated in Target  
660 retrieval solution pH 9.0 (Dako, Glostrup, Denmark) for 10 min at room temperature prior to  
661 incubating for 15min at  $110^\circ\text{C}$ . The sections or cell samples were washed in PBS and fixed in 4%  
662 paraformaldehyde (PFA) in PBS for 10 min at room temperature. Cells were permeabilised in PBS with  
663 0.1% Triton X-100 (Promega) for 30min, then washed in PBS. The sections or cells were blocked in 5%  
664 normal goat serum in PBS for 1 hour prior to incubation of the primary antibodies overnight. The  
665 antibodies used were listed in supplementary table 1. Antigen antibody complexes were visualised



666 with anti-mouse Alexa 488- or 594-conjugated antibody (Thermo Fisher Scientific) or Immpress anti-  
667 mouse/rabbit coupled with tyramide amplification kit (PerkinElmer, Inc). Nuclei were counterstained  
668 with DAPI.

### 669 **RNA in situ hybridisation**

670 Viral RNA in cells were detected and visualized with RNAscope in situ hybridization assay (Advanced  
671 Cell Diagnostics, MN, USA) following the manufacturer's instructions. The probe used for low-risk  
672 E6/E7 RNA detection was RNAscope Probe-HPV6/11 (415211).

### 673 **Competition assays**

674 In order to represent the growth condition of the basal layer of stratified epithelium in 2D in vitro  
675 assay (Saunders-Wood et al., 2022), NIKS were seeded at high (confluent) density on CellCarrier-96  
676 well ultra Microplates (Perkin Elmer). To each well,  $2.4 \times 10^4$  NIKS cells of each mCherry and eGFP were  
677 seeded with  $6 \times 10^3$  irradiated J2-3T3 feeder cells. Cells were cultured for up to 9 days. Media was  
678 changed every other day before being fixed in 4% PFA for 30 minutes. Bottom layer and second layer  
679 of the cells were visualised and scanned by Harmony Opera Phenix high content imaging system at  
680 MRC Institute of Metabolic Science (IMS), Cambridge. Magnification 20x, Field size 0.42mm<sup>2</sup>.

### 681 **SDS-PAGE and Western blotting**

682 Proteins were extracted from cells using RIPA buffer and quantified using the BCA protein assay kit  
683 (Pierce), before being separated on 4-12% gradient polyacrylamide-SDS-Tris-Tricine denaturing gel  
684 (Invitrogen) and transferred onto PVDF membranes (IPFL00010, Merck). After transfer, membranes  
685 were blocked for 1 hour at room temperature in 5% milk in TBS. Blots were then incubated overnight  
686 at 4 °C with appropriate primary antibody diluted in 5% milk in TBS. This is followed by incubating with  
687 appropriate IRDye 800cW fluorescent secondary antibody (Licor) for an hour at room temperature.

688 Protein bands were detected with Odyssey imaging system (Licor). Primary antibodies used in this  
689 study are listed in supplementary table 1.

### 690 **RNA sequencing**

691 Total RNA was extracted from three independent clones of NIKS parental control cells, NIKS-E6AP<sup>-/-</sup>,  
692 or NIKS transduced with E6 using the RNeasy mini kit (Qiagen). PolyA selection, reverse transcription,  
693 library construction, sequencing and bioinformatics analysis were performed by Novogene.  
694 Differentially expressed genes were selected based on a log<sub>2</sub>(FoldChange) >= 1 & padj <= 0.05 cut-off  
695 and were analysed for enriched biological processes using the GO (Gene Ontology) enrichment  
696 analysis tool.

### 697 **qRT-PCR**

698 Total RNA from NIKS was purified by using an RNeasy Mini Kit (Qiagen), with genomic DNA removed  
699 by Turbo DNA-free kit (Invitrogen). cDNA was synthesised with SuperScript III Reverse Transcriptase  
700 (Thermo Fisher scientific) using 100uM oligo dT, according to the manufacturer's instructions. The  
701 YAP-responsive genes PTGS2, PLAU, AREG, AXL, TGFBR3 and E6 gene and GAPDH were measured by  
702 ViiA 7 Real-Time PCR system (Life Technologies) using Fast SYBR master mix (Applied Biosystems) with  
703 15min denaturation at 95°C, followed by 45 cycles of 95°C for 15s and 60°C for 60s. The PCR primers  
704 for qPCR are listed in supplementary table 1.

### 705 **Clinical samples and ethics**

706 This study was approved by the institutional review board (IRB, Helsinki Committee) of The Galilee  
707 Medical Center. Approval Number NHR 0202-18 on March 12, 2018. The mode of collection,  
708 processing, and patient data-handling of the clinical samples used in this study have been described  
709 previously (Griffin et al., 2015).

### 710 **Acknowledgements**

711 This work is supported by the Medical Research Council (MC-PC-13050 and MR/S024409/1), Chinese  
712 scholarship council and Cambridge Trust. We thank Lawrence Banks for his generous gift of px459-  
713 E6AP plasmids. We acknowledge Louise Howard for tissue sectioning and the IMS-MRL Imaging Core  
714 for high content imaging. We also thank Dr. Yongxu Lu and Qi Zhong for valuable discussions and  
715 proofreading the manuscript.

716

#### 717 **Author Contributions**

718 Conception and design: WY, NE, JD. Acquisition of data: WY, NE, KZ, AA. Analysis and interpretation of  
719 data: WY, NE, HG, JD. Drafting or revising the article: WY, JD.

720

721

722

723

724

725

726

727

728

729

730

731

732

733

734

735

736

737 **Supplementary figures**

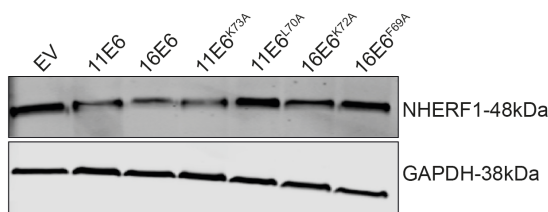

738

739 **Figure 2-supplementary 1. Validation of NHERF1 degradation deficient mutants of E6.** NIKS cells

740 were retrovirally transduced with vectors encoding 11E6, 16E6, 11E6<sup>K73A</sup>, 11E6<sup>L70A</sup>, 16E6<sup>K72A</sup> and

741 16E6<sup>F69A</sup>. Cells were cultured at 8x 10<sup>6</sup> cells/well in six-well plates and cell lysates were collected for

742 western blotting. NHERF1 (Santa cruz) and GAPDH (EMD Millipore Corp. USA) primary antibodies were

743 used to detect specific protein bands.

744

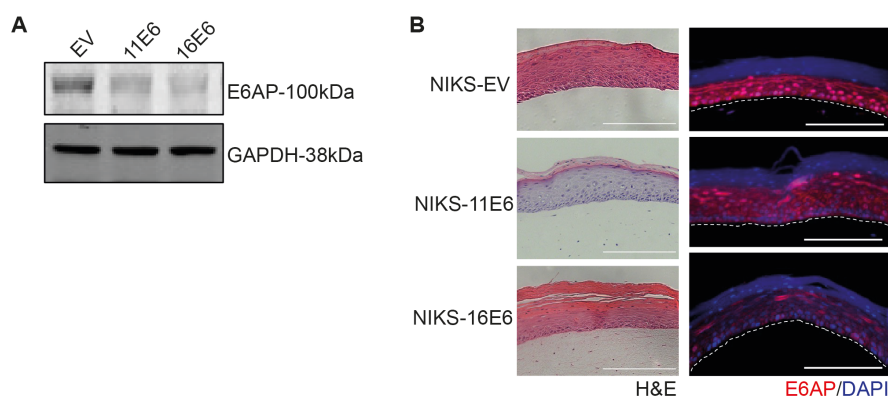

745

746 **Figure 4-supplementary 1. E6 expression causes E6AP level reduction in NIKS.** (A) NIKS cells

747 expressing either 11E6 or 16E6 were lysed and subject to western blotting for E6AP (Merck). (B) NIKS

748 cells expressing either 11E6 or 16E6 were used to establish organotypic rafts, followed by

749 immunofluorescent staining with E6AP and DAPI (Merck). Scare bar = 200µm.

750

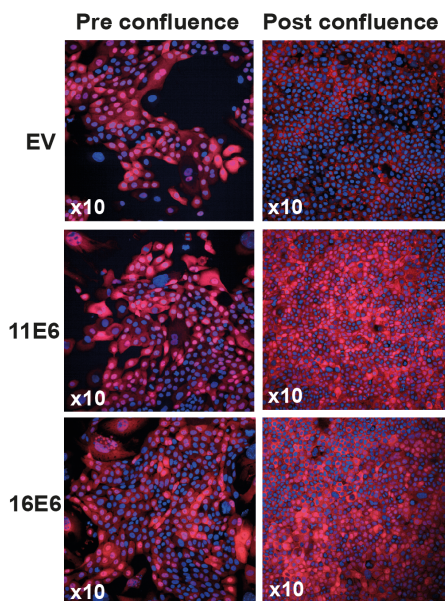

751

752 **Figure 5-supplementary 1. E6 expression promotes YAP nuclear localisation at post-confluence.** NIKS

753 cells expressing either 11E6 or 16E6 along with control cells were seeded at 12,000 cells/well (pre-

754 confluence) and 48,000 cells/well (post-confluence) in 96-well plates. Cells were fixed after 72 hours

755 and stained with active YAP antibody (Abcam) and DAPI. Images were captured by Confocal

756 microscope at IMS with 10x magnification.

757

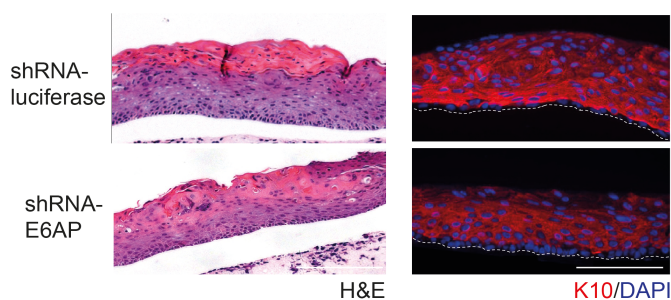

758

759 **Figure 6-supplementary 1. E6AP depletion leads to delay of K10 expression in NIKS rafts.** NIKS cells

760 were transduced with lentiviral vectors encoding shRNA targeting either luciferase or E6AP. After

761 selection, NIKS rafts were established, followed by H&E (left) and immunofluorescent staining (right)

762 with K10 (Abcam) and DAPI. Scale bar = 200µm.

763

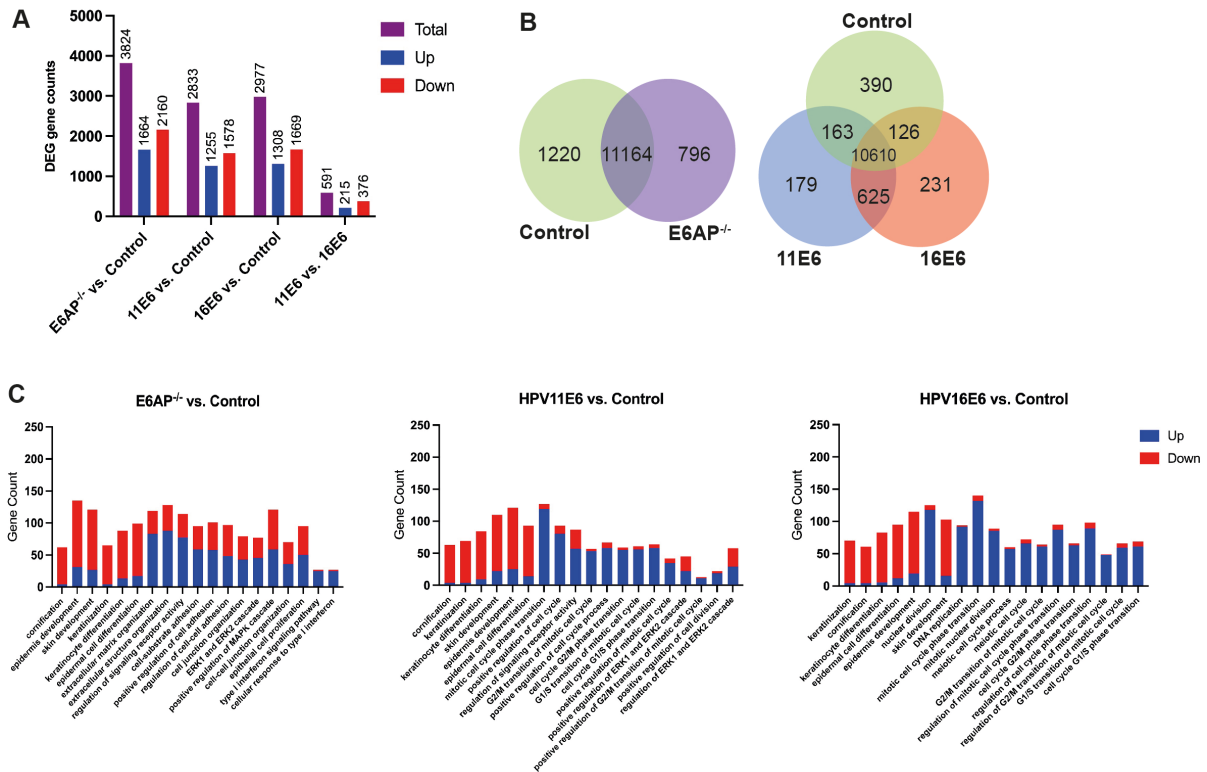

764

765 **Figure 7-supplementary 1. Differential gene expression (DEG) and Gene Ontology (GO) enrichment**

766 **analysis of RNA sequencing results for E6AP<sup>-/-</sup> and E6-expressing cells. (A) Total number of**

767 **differentially expressed genes (DEG) (purple), number of up-regulated genes (blue) and number of**

768 **down-regulated genes (red) in each experimental group. (B) Vann diagram shows the number of co-**

769 **expressed genes between the samples. (C) The X-axis displays the selected GO terms that are the most**

770 **relevant and significant, which ranks from left to right and left is the most significant term. The y-axis**

771 **shows the number of genes that were up-regulated (blue) or down-regulated (red) under each GO**

772 **term.**

773

774

775

776

777

778

779 **References**

- 780 Accardi, R., Rubino, R., Scalise, M., Gheit, T., Shahzad, N., Thomas, M., Banks, L., Indiveri, C., Sylla, B.  
781 S., Cardone, R. A., Reshkin, S. J., & Tommasino, M. (2011). E6 and E7 from Human  
782 Papillomavirus Type 16 Cooperate To Target the PDZ Protein Na/H Exchange Regulatory Factor  
783 1. *Journal of Virology*, *85*(16), 8208–8216. <https://doi.org/10.1128/jvi.00114-11>
- 784 Akladios, B., Mendoza-Reinoso, V., Samuel, M. S., Hardeman, E. C., Khosrotehrani, K., Key, B., &  
785 Beverdam, A. (2017). Epidermal YAP2-5SA-ΔC Drives β-Catenin Activation to Promote  
786 Keratinocyte Proliferation in Mouse Skin In Vivo. *The Journal of Investigative Dermatology*,  
787 *137*(3), 716–726. <https://doi.org/10.1016/j.jid.2016.10.029>
- 788 Allen-Hoffmann, B. L., Schlosser, S. J., Ivarie, C. A. R., Meisner, L. F., O'Connor, S. L., & Sattler, C. A.  
789 (2000). Normal Growth and Differentiation in a Spontaneously Immortalized Near-Diploid  
790 Human Keratinocyte Cell Line, NIKS. *Journal of Investigative Dermatology*, *114*(3), 444–455.  
791 <https://doi.org/https://doi.org/10.1046/j.1523-1747.2000.00869.x>
- 792 Bernard, H.-U., Burk, R. D., Chen, Z., van Doorslaer, K., zur Hausen, H., & de Villiers, E.-M. (2010).  
793 Classification of papillomaviruses (PVs) based on 189 PV types and proposal of taxonomic  
794 amendments. *Virology*, *401*(1), 70–79.  
795 <https://doi.org/https://doi.org/10.1016/j.virol.2010.02.002>
- 796 Bernascone, I., & Martin-Belmonte, F. (2013). Crossroads of Wnt and Hippo in epithelial tissues.  
797 *Trends in Cell Biology*, *23*(8), 380–389. <https://doi.org/10.1016/j.tcb.2013.03.007>
- 798 Brimer, N., Drews, C. M., & Vande Pol, S. B. (2017). Association of papillomavirus E6 proteins with  
799 either MAML1 or E6AP clusters E6 proteins by structure, function, and evolutionary  
800 relatedness. *PLoS Pathogens*, *13*(12). <https://doi.org/10.1371/journal.ppat.1006781>
- 801 Brimer, N., Lyons, C., & Vande Pol, S. B. (2007). Association of E6AP (UBE3A) with human  
802 papillomavirus type 11 E6 protein. *Virology*, *358*(2), 303–310.  
803 <https://doi.org/10.1016/j.virol.2006.08.038>
- 804 Brimer, N., Lyons, C., Wallberg, A. E., & Vande Pol, S. B. (2012). Cutaneous papillomavirus E6

805 oncoproteins associate with MAML1 to repress transactivation and NOTCH signaling.  
806 *Oncogene*, 31(43), 4639–4646.

807 Brimer, N., & Vande Pol, S. (2022). Human papillomavirus type 16 E6 induces cell competition. *PLOS*  
808 *Pathogens*, 18(3), e1010431. <https://doi.org/10.1371/journal.ppat.1010431>

809 Cooper, B., Schneider, S., Bohl, J., Jiang, Y., Beaudet, A., & Pol, S. Vande. (2003). Requirement of  
810 E6AP and the features of human papillomavirus E6 necessary to support degradation of p53.  
811 *Virology*, 306(1), 87–99.

812 Corley, S. M., Mendoza-Reinoso, V., Giles, N., Singer, E. S., Common, J. E., Wilkins, M. R., &  
813 Beverdam, A. (2018). Plau and Tgfbr3 are YAP-regulated genes that promote keratinocyte  
814 proliferation. *Cell Death and Disease*, 9(11). <https://doi.org/10.1038/s41419-018-1141-5>

815 Del Pino, M., Bleeker, M. C. G., Quint, W. G., Snijders, P. J. F., Meijer, C. J. L. M., & Steenbergen, R. D.  
816 M. (2012). Comprehensive analysis of human papillomavirus prevalence and the potential role  
817 of low-risk types in verrucous carcinoma. *Modern Pathology*, 25(10), 1354–1363.

818 Doorbar, J., Quint, W., Banks, L., Bravo, I. G., Stoler, M., Broker, T. R., & Stanley, M. A. (2012). The  
819 biology and life-cycle of human papillomaviruses. *Vaccine*, 30(SUPPL.5), F55–F70.  
820 <https://doi.org/10.1016/j.vaccine.2012.06.083>

821 Doorbar, J., Zheng, K., Aiyenuro, A., Yin, W., Walker, C. M., Chen, Y., Egawa, N., & Griffin, H. M.  
822 (2021). Principles of epithelial homeostasis control during persistent human papillomavirus  
823 infection and its deregulation at the cervical transformation zone. *Current Opinion in Virology*,  
824 51, 96–105. <https://doi.org/10.1016/j.coviro.2021.09.014>

825 Drews, C. M., Brimer, N., & Vande Pol, S. B. (2020). Multiple regions of E6AP (UBE3A) contribute to  
826 interaction with papillomavirus E6 proteins and the activation of ubiquitin ligase activity. *PLoS*  
827 *Pathogens*, 16(1), 1–25. <https://doi.org/10.1371/journal.ppat.1008295>

828 Drews, C. M., Case, S., & Pol, S. B. V. (2019). E6 proteins from high-risk HPV, low-risk HPV, and animal  
829 papillomaviruses activate the Wnt/ $\beta$ -catenin pathway through E6AP-dependent degradation of  
830 NHERF1. *PLoS Pathogens*, 15(4). <https://doi.org/10.1371/journal.ppat.1007575>



- 831 Egawa, N., & Doorbar, J. (2017). The low-risk papillomaviruses. *Virus Research*, *231*, 119–127.  
832 <https://doi.org/10.1016/j.virusres.2016.12.017>
- 833 Elbediwy, A., Vincent-Mistiaen, Z. I., Spencer-Dene, B., Stone, R. K., Boeing, S., Wculek, S. K.,  
834 Cordero, J., Tan, E. H., Ridgway, R., Brunton, V. G., Sahai, E., Gerhardt, H., Behrens, A.,  
835 Malanchi, I., Sansom, O. J., & Thompson, B. J. (2016). Integrin signalling regulates YAP and TAZ  
836 to control skin homeostasis. *Development (Cambridge)*, *143*(10), 1674–1687.  
837 <https://doi.org/10.1242/dev.133728>
- 838 Flores, E. R., Allen-Hoffmann, B. L., Lee, D., Sattler, C. A., & Lambert, P. F. (1999). Establishment of  
839 the human papillomavirus type 16 (HPV-16) life cycle in an immortalized human foreskin  
840 keratinocyte cell line. *Virology*, *262*(2), 344–354. <https://doi.org/10.1006/viro.1999.9868>
- 841 Franklin, J. M., Ghosh, R. P., Shi, Q., Reddick, M. P., & Liphardt, J. T. (2020). Concerted localization-  
842 resets precede YAP-dependent transcription. *Nature Communications*, *11*(1), 1–18.
- 843 Georgescu, M. M., Gagea, M., & Cote, G. (2016). NHERF1/EBP50 Suppresses Wnt- $\beta$ -Catenin  
844 Pathway–Driven Intestinal Neoplasia. *Neoplasia (United States)*, *18*(8), 512–523.  
845 <https://doi.org/10.1016/j.neo.2016.07.003>
- 846 Goon, P., Sonnex, C., Jani, P., Stanley, M., & Sudhoff, H. (2008). Recurrent respiratory papillomatosis:  
847 An overview of current thinking and treatment. *European Archives of Oto-Rhino-Laryngology*,  
848 *265*(2), 147–151. <https://doi.org/10.1007/s00405-007-0546-z>
- 849 Griffin, H., Soneji, Y., Van Baars, R., Arora, R., Jenkins, D., Van De Sandt, M., Wu, Z., Quint, W., Jach,  
850 R., Okon, K., Huras, H., Singer, A., & Doorbar, J. (2015). Stratification of HPV-induced cervical  
851 pathology using the virally encoded molecular marker E4 in combination with p16 or MCM.  
852 *Modern Pathology*, *28*(7), 977–993. <https://doi.org/10.1038/modpathol.2015.52>
- 853 Gupta, S., Kumar, P., & Das, B. C. (2018). HPV: Molecular pathways and targets. *Current Problems in*  
854 *Cancer*, *42*(2), 161–174. <https://doi.org/10.1016/j.currproblcancer.2018.03.003>
- 855 Handa, K., Yugawa, T., Narisawa-Saito, M., Ohno, S. -i., Fujita, M., & Kiyono, T. (2007). E6AP-  
856 Dependent Degradation of DLG4/PSD95 by High-Risk Human Papillomavirus Type 18 E6

- 857 Protein. *Journal of Virology*, 81(3), 1379–1389. <https://doi.org/10.1128/jvi.01712-06>
- 858 Hatterschide, J., Bohidar, A. E., Grace, M., Nulton, T. J., Kim, H. W., Windle, B., Morgan, I. M.,  
859 Munger, K., & White, E. A. (2019). PTPN14 degradation by high-risk human papillomavirus E7  
860 limits keratinocyte differentiation and contributes to HPV-mediated oncogenesis. *Proceedings*  
861 *of the National Academy of Sciences of the United States of America*, 116(14), 7033–7042.  
862 <https://doi.org/10.1073/pnas.1819534116>
- 863 Hatterschide, J., Castagnino, P., Kim, H. W., Sperry, S. M., Montone, K. T., Basu, D., & White, E. A.  
864 (2022). YAP1 activation by human papillomavirus E7 promotes basal cell identity in squamous  
865 epithelia. *ELife*, 11, 1–26. <https://doi.org/10.7554/elife.75466>
- 866 He, C., Mao, D., Hua, G., Lv, X., Chen, X., Angeletti, P. C., Dong, J., Remmenga, S. W., Rodabaugh, K.  
867 J., Zhou, J., Lambert, P. F., Yang, P., Davis, J. S., & Wang, C. (2015). The Hippo/ YAP pathway  
868 interacts with EGFR signaling and HPV oncoproteins to regulate cervical cancer progression .  
869 *EMBO Molecular Medicine*, 7(11), 1426–1449. <https://doi.org/10.15252/emmm.201404976>
- 870 Herfs, M., Soong, T. R., Delvenne, P., & Crum, C. P. (2017). Deciphering the multifactorial  
871 susceptibility of mucosal junction cells to HPV infection and related carcinogenesis. *Viruses*,  
872 9(4). <https://doi.org/10.3390/v9040085>
- 873 Id, C. M. D., Case, S., Vande, S. B., & Id, P. (2019). *E6 proteins from high-risk HPV , low-risk HPV , and*  
874 *animal papillomaviruses activate the Wnt /  $\beta$  -catenin pathway through E6AP-dependent*  
875 *degradation of NHERF1*. 1–21.
- 876 Ivancic, R, Iqbal, H., Desilva, B., Pan, Q., & Matrka, L. (2020). Immunological tolerance of low-risk HPV  
877 in recurrent respiratory papillomatosis. *Clinical & Experimental Immunology*, 199(2), 131–142.
- 878 Ivancic, Ryan, Iqbal, H., deSilva, B., Pan, Q., & Matrka, L. (2018). Current and future management of  
879 recurrent respiratory papillomatosis. *Laryngoscope Investigative Otolaryngology*, 3(1), 22–34.  
880 <https://doi.org/10.1002/lio2.132>
- 881 Jayashree Thatte, L. B. (2018). *Human Papillomavirus 16 (HPV-16), HPV- 18, and HPV-31 E6 Override*  
882 *the Normal Phosphoregulation of E6AP Enzymatic Activity*. 91(22), 1–15.

- 883 John Doorbar. (2015). Human papillomavirus molecular biology and disease association. *Reviews in*  
884 *Medical Virology*, 19(1), 57–64. <https://doi.org/10.1002/rmv>
- 885 Kao, W. H., Beaudenon, S. L., Talis, A. L., Huibregtse, J. M., & Howley, P. M. (2000). Human  
886 Papillomavirus Type 16 E6 Induces Self-Ubiquitination of the E6AP Ubiquitin-Protein Ligase.  
887 *Journal of Virology*, 74(14), 6408–6417. <https://doi.org/10.1128/jvi.74.14.6408-6417.2000>
- 888 Khelil, M., Griffin, H., Bleeker, M. C. G., Steenbergen, R. D. M., Zheng, K., Saunders-Wood, T.,  
889 Samuels, S., Rotman, J., Vos, W., van den Akker, B. E., de Menezes, R. X., Kenter, G. G., Doorbar,  
890 J., & Jordanova, E. S. (2021). Delta-like ligand-Notch1 signalling is selectively modulated by  
891 HPV16 E6 to promote squamous cell proliferation and correlates with cervical cancer  
892 prognosis. *Cancer Research*, canres.CAN-20-1996-A.2020. [https://doi.org/10.1158/0008-](https://doi.org/10.1158/0008-5472.can-20-1996)  
893 [5472.can-20-1996](https://doi.org/10.1158/0008-5472.can-20-1996)
- 894 Kim, H., Son, S., Ko, Y., & Shin, I. (2021). CTGF regulates cell proliferation, migration, and glucose  
895 metabolism through activation of FAK signaling in triple-negative breast cancer. *Oncogene*,  
896 40(15), 2667–2681.
- 897 Kim, M. K., Jang, J. W., & Bae, S. C. (2018). DNA binding partners of YAP/TAZ. *BMB Reports*, 51(3),  
898 126–133. <https://doi.org/10.5483/BMBRep.2018.51.3.015>
- 899 Koh, S. B., Mascalchi, P., Rodriguez, E., Lin, Y., Jodrell, D. I., Richards, F. M., & Lyons, S. K. (2017). A  
900 quantitative FastFUCCI assay defines cell cycle dynamics at a single-cell level. *Journal of Cell*  
901 *Science*, 130(2), 512–520. <https://doi.org/10.1242/jcs.195164>
- 902 Kranjec, C., & Doorbar, J. (2016). ScienceDirect Human papillomavirus infection and induction of  
903 neoplasia : a matter of fitness. *Current Opinion in Virology*, 20, 129–136.  
904 <https://doi.org/10.1016/j.coviro.2016.08.011>
- 905 Kranjec, C., Hollywood, C., Libert, D., Griffin, H., Mahmood, R., Isaacson, E., & Doorbar, J. (2017).  
906 Modulation of basal cell fate during productive and transforming HPV-16 infection is mediated  
907 by progressive E6-driven depletion of Notch. *Journal of Pathology*, 242(4), 448–462.  
908 <https://doi.org/10.1002/path.4917>

- 909 Lambert, P. F., Ozbun, M. A., Collins, A., Holmgren, S., Lee, D., & Nakahara, T. (2005). Using an  
910 immortalized cell line to study the HPV life cycle in organotypic “raft” cultures. In *Human*  
911 *Papillomaviruses* (pp. 141–155). Springer.
- 912 Li, J., Shi, C., Zhou, R., Han, Y., Xu, S., Ma, H., & Zhang, Z. (2020). The crosstalk between AXL and YAP  
913 promotes tumor progression through STAT3 activation in head and neck squamous cell  
914 carcinoma. *Cancer Science*, *111*(9), 3222–3235.
- 915 Lichtig, H., Gilboa, D. A., Jackman, A., Gonen, P., Levav-Cohen, Y., Haupt, Y., & Sherman, L. (2010).  
916 HPV16 E6 augments Wnt signaling in an E6AP-dependent manner. *Virology*, *396*(1), 47–58.  
917 <https://doi.org/10.1016/j.virol.2009.10.011>
- 918 Luna, A. J., Sterk, R. T., Griego-Fisher, A. M., Chung, J.-Y., Berggren, K. L., Bondu, V., Barraza-Flores,  
919 P., Cowan, A. T., Gan, G. N., & Yilmaz, E. (2021). MEK/ERK signaling is a critical regulator of high-  
920 risk human papillomavirus oncogene expression revealing therapeutic targets for HPV-induced  
921 tumors. *PLoS Pathogens*, *17*(1), e1009216.
- 922 McBride, A. A. (2017). Mechanisms and strategies of papillomavirus replication. *Biological Chemistry*,  
923 *398*(8), 919–927. <https://doi.org/10.1515/hsz-2017-0113>
- 924 McBride, A. A. (2022). Human papillomaviruses: diversity, infection and host interactions. *Nature*  
925 *Reviews Microbiology*, *20*(2), 95–108. <https://doi.org/10.1038/s41579-021-00617-5>
- 926 Meyers, J. M., Uberoi, A., Grace, M., Lambert, P. F., & Munger, K. (2017). Cutaneous HPV8 and  
927 MmuPV1 E6 Proteins Target the NOTCH and TGF- $\beta$  Tumor Suppressors to Inhibit Differentiation  
928 and Sustain Keratinocyte Proliferation. *PLoS Pathogens*, *13*(1), 1–29.  
929 <https://doi.org/10.1371/journal.ppat.1006171>
- 930 Mishra, A, & Jana, N. R. (2008). Regulation of turnover of tumor suppressor p53 and cell growth by  
931 E6-AP, a ubiquitin protein ligase mutated in Angelman mental retardation syndrome. *Cellular*  
932 *and Molecular Life Sciences*, *65*(4), 656–666.
- 933 Mishra, Amit, Godavarthi, S. K., & Jana, N. R. (2009). UBE3A/E6-AP regulates cell proliferation by  
934 promoting proteasomal degradation of p27. *Neurobiology of Disease*, *36*(1), 26–34.

- 935 Murakami, I., Egawa, N., Griffin, H., Yin, W., Kranjec, C., Nakahara, T., Kiyono, T., & Doorbar, J.  
936 (2019). Roles for E1-independent replication and E6-mediated p53 degradation during low-risk  
937 and high-risk human papillomavirus genome maintenance. *PLoS Pathogens*, 15(5).  
938 <https://doi.org/10.1371/journal.ppat.1007755>
- 939 Naviaux, R. K., Costanzi, E., Haas, M., & Verma, I. M. (1996). The pCL vector system: rapid production  
940 of helper-free, high-titer, recombinant retroviruses. *Journal of Virology*, 70(8), 5701–5705.  
941 <https://doi.org/10.1128/jvi.70.8.5701-5705.1996>
- 942 Nicole Brimer, Charles Lyons, and S. B. V. P. (2007). Association of E6AP (UBE3A) with Human  
943 Papillomavirus Type 11 E6 Protein. 71(2), 233–236. <https://doi.org/10.1038/mp.2011.182>.doi
- 944 Oh, S. T., Longworth, M. S., & Laimins, L. A. (2004). Roles of the E6 and E7 Proteins in the Life Cycle of  
945 Low-Risk Human Papillomavirus Type 11. 78(5), 2620–2626.  
946 <https://doi.org/10.1128/JVI.78.5.2620>
- 947 Olmedo-Nieva, L., Muñoz-Bello, J. O., Manzo-Merino, J., & Lizano, M. (2020). New insights in Hippo  
948 signalling alteration in human papillomavirus-related cancers. *Cellular Signalling*, 76(October).  
949 <https://doi.org/10.1016/j.cellsig.2020.109815>
- 950 Ramamoorthy, S., Tufail, R., Hokayem, J. El, Jorda, M., Zhao, W., Reis, Z., & Nawaz, Z. (2012).  
951 Overexpression of ligase defective E6-associated protein, E6-AP, results in mammary  
952 tumorigenesis. *Breast Cancer Research and Treatment*, 132(1), 97–108.
- 953 Rice, G., & Rompolas, P. (2020). Advances in resolving the heterogeneity and dynamics of  
954 keratinocyte differentiation. *Current Opinion in Cell Biology*, 67, 92–98.  
955 <https://doi.org/10.1016/j.ceb.2020.09.004>
- 956 Saitou, T., & Imamura, T. (2016). Quantitative imaging with Fucci and mathematics to uncover  
957 temporal dynamics of cell cycle progression. *Development Growth and Differentiation*, 58(1),  
958 6–15. <https://doi.org/10.1111/dgd.12252>
- 959 Sanchez-Danes, A., & Blanpain, C. (2018). Deciphering the cells of origin of squamous cell  
960 carcinomas. *Nature Reviews Cancer*, 18(9), 549–561.

- 961 Saunders-Wood, T., Egawa, N., Zheng, K., Giaretta, A., Griffin, H. M., & Doorbar, J. (2022). Role of E6  
962 in Maintaining the Basal Cell Reservoir during Productive Papillomavirus Infection. *Journal of*  
963 *Virology*, 96(5). <https://doi.org/10.1128/jvi.01181-21>
- 964 Saxena, K., Dawson, R. S., Cyhaniuk, A., Bello, T., & Janjan, N. (2022). Clinical and economic burden of  
965 HPV-related cancers in the US veteran population. *Journal of Medical Economics*, 25(1), 299–  
966 308.
- 967 Sharma, P., Alsharif, S., Fallatah, A., & Chung, B. M. (2019). Intermediate filaments as effectors of  
968 cancer development and metastasis: a focus on keratins, vimentin, and nestin. *Cells*, 8(5), 497.
- 969 Sherman, L., & Schlegel, R. (1996). Serum- and calcium-induced differentiation of human  
970 keratinocytes is inhibited by the E6 oncoprotein of human papillomavirus type 16. *Journal of*  
971 *Virology*, 70(5), 3269–3279.  
972 <http://www.ncbi.nlm.nih.gov/pubmed/8627810><http://www.pubmedcentral.nih.gov/articlerender.fcgi?artid=PMC190193>
- 974 Sherman, Levana, Itzhaki, H., Jackman, A., Chen, J. J., Koval, D., & Schlegel, R. (2002). Inhibition of  
975 serum- and calcium-induced terminal differentiation of human keratinocytes by HPV 16 E6:  
976 study of the association with p53 degradation, inhibition of p53 transactivation, and binding to  
977 E6BP. *Virology*, 292(2), 309–320. <https://doi.org/10.1006/viro.2001.1263>
- 978 Sominsky, S., Kuslansky, Y., Shapiro, B., Jackman, A., Haupt, Y., Rosin-Arbesfeld, R., & Sherman, L.  
979 (2014). HPV16 E6 and E6AP differentially cooperate to stimulate or augment Wnt signaling.  
980 *Virology*, 468, 510–523. <https://doi.org/10.1016/j.virol.2014.09.007>
- 981 Srinivasan, S., & Nawaz, Z. (2011). E3 ubiquitin protein ligase, E6-associated protein (E6-AP)  
982 regulates PI3K-Akt signaling and prostate cell growth. *Biochimica et Biophysica Acta (BBA)-*  
983 *Gene Regulatory Mechanisms*, 1809(2), 119–127.
- 984 Stanley, M. A. (2012). Epithelial Cell Responses to Infection with Human Papillomavirus. *Clinical*  
985 *Microbiology Reviews*, 25(2), 215–222. <https://doi.org/10.1128/CMR.05028-11>
- 986 Tan, M. J. A., White, E. A., Sowa, M. E., Harper, J. W., Aster, J. C., & Howley, P. M. (2012). Cutaneous

- 987  $\beta$ -human papillomavirus E6 proteins bind Mastermind-like coactivators and repress Notch  
988 signaling. *Proceedings of the National Academy of Sciences of the United States of America*,  
989 *109*(23), 1473–1480. <https://doi.org/10.1073/pnas.1205991109>
- 990 Tani, T., Eitsuka, Katayama, Nagamine, Nakaya, Y., Suzuki, H., Kiyono, T., Nakagawa, K., Inoue-  
991 Murayama, M., Onuma, M., & Fukuda, T. (2019). Establishment of immortalized primary cell  
992 from the critically endangered Bonin flying fox (*Pteropus pselaphon*). *PLoS ONE*, *14*(8), 1–19.  
993 <https://doi.org/10.1371/journal.pone.0221364>
- 994 Thapa, N., Maharjan, M., Shrestha, G., Maharjan, N., Petrini, M. A., Zuo, N., He, C., Yang, J., Xu, M., &  
995 Ge, C. (2018). Prevalence and type-specific distribution of human papillomavirus infection  
996 among women in mid-western rural, Nepal-A population-based study. *BMC Infectious Diseases*,  
997 *18*(1), 1–8.
- 998 Totaro, A., Castellan, M., Battilana, G., Zanconato, F., Azzolin, L., Giulitti, S., Cordenonsi, M., &  
999 Piccolo, S. (2017). YAP/TAZ link cell mechanics to Notch signalling to control epidermal stem  
1000 cell fate. *Nature Communications*, *8*(1), 1–13.
- 1001 Totaro, A., Castellan, M., Di Biagio, D., & Piccolo, S. (2018). Crosstalk between YAP/TAZ and Notch  
1002 Signaling. *Trends in Cell Biology*, *28*(7), 560–573. <https://doi.org/10.1016/j.tcb.2018.03.001>
- 1003 Totaro, A., Panciera, T., & Piccolo, S. (2018). YAP/TAZ upstream signals and downstream responses.  
1004 *Nature Cell Biology*, *20*(8), 888–899. <https://doi.org/10.1038/s41556-018-0142-z>
- 1005 Vats, A., Thatte, J., & Banks, L. (2019). Identification of E6AP-independent degradation targets of  
1006 HPV E6. *The Journal of General Virology*, *100*(12), 1674–1679.  
1007 <https://doi.org/10.1099/jgv.0.001331>
- 1008 Vincent-Mistiaen, Z., Elbediwy, A., Vanyai, H., Cotton, J., Stamp, G., Nye, E., Spencer-Dene, B.,  
1009 Thomas, G. J., Mao, J., & Thompson, B. (2018). YAP drives cutaneous squamous cell carcinoma  
1010 formation and progression. *Elife*, *7*, e33304.
- 1011 Wang, Q., Griffin, H., Southern, S., Jackson, D., Martin, A., McIntosh, P., Davy, C., Masterson, P. J.,  
1012 Walker, P. A., Laskey, P., Omary, M. B., & Doorbar, J. (2004). Functional Analysis of the Human

- 1013 Papillomavirus Type 16 E1  $\wedge$  E4 Protein Provides a Mechanism for In Vivo and In Vitro Keratin  
1014 Filament Reorganization . *Journal of Virology*, 78(2), 821–833.  
1015 <https://doi.org/10.1128/jvi.78.2.821-833.2004>
- 1016 Watt, F. M. (1989). Terminal differentiation of epidermal keratinocytes. *Current Opinion in Cell  
1017 Biology*, 1(6), 1107–1115.
- 1018 Watt, F. M., Jordan, P. W., & O'Neill, C. H. (1988). Cell shape controls terminal differentiation of  
1019 human epidermal keratinocytes. *Proceedings of the National Academy of Sciences*, 85(15),  
1020 5576–5580.
- 1021 Webb Strickland, S., Brimer, N., Lyons, C., & Vande Pol, S. B. (2018). Human Papillomavirus E6  
1022 interaction with cellular PDZ domain proteins modulates YAP nuclear localization. *Virology*,  
1023 516(September 2017), 127–138. <https://doi.org/10.1016/j.virol.2018.01.003>
- 1024 Werner, S., Keller, L., & Pantel, K. (2020). Epithelial keratins: Biology and implications as diagnostic  
1025 markers for liquid biopsies. *Molecular Aspects of Medicine*, 72, 100817.
- 1026 Wheeler, D. S., Barrick, S. R., Grubisha, M. J., Brufsky, A. M., Friedman, P. A., & Romero, G. (2011).  
1027 Direct interaction between NHERF1 and Frizzled regulates B-catenin signaling. *Oncogene*, 30(1),  
1028 32–42. <https://doi.org/10.1038/onc.2010.389>
- 1029 Xiao, H., Wu, L., Zheng, H., Li, N., Wan, H., Liang, G., Zhao, Y., & Liang, J. (2014). Expression of Yes-  
1030 associated protein in cervical squamous epithelium lesions. *International Journal of  
1031 Gynecologic Cancer*, 24(9).
- 1032 Yugawa, T., Handa, K., Narisawa-Saito, M., Ohno, S., Fujita, M., & Kiyono, T. (2007). Regulation of  
1033 Notch1 Gene Expression by p53 in Epithelial Cells. *Molecular and Cellular Biology*, 27(10),  
1034 3732–3742. <https://doi.org/10.1128/mcb.02119-06>
- 1035 Zhao, B., Li, L., Tumaneng, K., Wang, C.-Y., & Guan, K.-L. (2010). A coordinated phosphorylation by  
1036 Lats and CK1 regulates YAP stability through SCF $\beta$ -TRCP. *Genes & Development*, 24(1), 72–85.
- 1037 Zhao, B., Wei, X., Li, W., Udan, R. S., Yang, Q., Kim, J., Xie, J., Ikenoue, T., Yu, J., Li, L., Zheng, P., Ye, K.,  
1038 Chinnaiyan, A., Halder, G., Lai, Z. C., & Guan, K. L. (2007). Inactivation of YAP oncoprotein by



- 1039 the Hippo pathway is involved in cell contact inhibition and tissue growth control. *Genes and*  
1040 *Development*, 21(21), 2747–2761. <https://doi.org/10.1101/gad.1602907>
- 1041 Zheng, K., Egawa, N., Shiraz, A., Katakuse, M., Okamura, M., Griffin, H. M., & Doorbar, J. (2022). The  
1042 Reservoir of Persistent Human Papillomavirus Infection; Strategies for Elimination using Anti-  
1043 Viral Therapies. *Viruses*, 14(2), 214.
- 1044 Zimmermann, H., Degenkolbe, R., Bernard, H.-U., & O'Connor, M. J. (1999). The Human  
1045 Papillomavirus Type 16 E6 Oncoprotein Can Down-Regulate p53 Activity by Targeting the  
1046 Transcriptional Coactivator CBP/p300. *Journal of Virology*, 73(8), 6209–6219.  
1047 <https://doi.org/10.1128/jvi.73.8.6209-6219.1999>
- 1048
- 1049
